# Supplementary material for: FoxP1 is a transcriptional repressor associated with cancer cachexia that induces skeletal muscle wasting and weakness
Source: J Cachexia Sarcopenia Muscle. 2021 Feb 1;12(2):421–42. doi: 10.1002/jcsm.12666 (PMC8061399; doi:10.1002/jcsm.12666)
Supplement: Supplementary file 2 — Data S2. Supporting Information [file JCSM-12-421-s003.xlsx]

## Sheet: Article information
Title:
FoxP1 is sufficient and required for skeletal muscle wasting
Authors:
Daria Neyroud1, Rachel L. Nosacka1, Jose G. Trevino2, Hui Hu3, Sarah M. Judge1* & Andrew R. Judge1*
1Department of Physical Therapy, University of Florida, Gainesville, Florida, USA
2Department of Surgery, University of Florida, Gainesville, Florida, USA
3Department of Microbiology, University of Alabama at Birmingham, Birmingham, Alabama, USA
Corresponding author:
*Correspondence to:
Andrew R. Judge, Ph.D.		or		Sarah M. Judge, Ph.D.
Department of Physical Therapy			Department of Physical Therapy
University of Florida					University of Florida
Gainesville, FL 32610				Gainesville, FL 32610
Ph: 1 (352) 273-9220					Ph: 1 (352) 273-9146
Email: arjudge@phhp.ufl.edu			Email: smsenf@ufl.edu
Journal:
Journal of Cachexia, Sarcopenia and Muscle

## Sheet: Supp file 2
	* Gene expression normalized to sham. Calculated comparative gene expression in C26-FoxP1-shRNA vs C26 scrambled shRNA. 249 genes downregulated 2-fold or more in response to C26 (scrambled-shRNA group), and rescued by 2-fold or greater in muscles expressing FoxP1-shRNA
			Fold (vs Sham)
Mouse Entrez Gene ID	Human Entrez Gene ID	Symbol	C26	C26 FoxP1 shRNA	C26 FoxP1/C26	Description	GO Term(s)	KEGG Pathway(s)
387151		Mir133a-1	0.0483395	0.541253	11.1969	microRNA 133a-1	GO:0010628: positive regulation of gene expression, GO:0010629: negative regulation of gene expression, GO:0035195: gene silencing by miRNA, GO:0045668: negative regulation of osteoblast differentiation, GO:0060043: regulation of cardiac muscle cell proliferation, GO:0070482: response to oxygen levels
238564	340156	Mylk4	0.034108	0.325017	9.52907	myosin light chain kinase family, member 4	GO:0000166: nucleotide binding, GO:0004672: protein kinase activity, GO:0004674: protein serine/threonine kinase activity, GO:0005524: ATP binding, GO:0005575: cellular_component, GO:0006468: protein phosphorylation, GO:0016301: kinase activity, GO:0016310: phosphorylation, GO:0016740: transferase activity, GO:0016772: transferase activity, transferring phosphorus-containing groups
546611	123103	Klhl33	0.117097	1.03328	8.82415	kelch-like 33 (Drosophila)	GO:0003674: molecular_function, GO:0005575: cellular_component, GO:0008150: biological_process
80909	729438	Gatsl2	0.1497	1.29909	8.67793	GATS protein-like 2	GO:0003674: molecular_function, GO:0005575: cellular_component, GO:0008150: biological_process
245527	60401	Eda2r	0.360373	3.02249	8.38712	ectodysplasin A2 receptor	GO:0004872: receptor activity, GO:0005575: cellular_component, GO:0005887: integral to plasma membrane, GO:0007275: multicellular organismal development, GO:0012501: programmed cell death, GO:0016020: membrane, GO:0016021: integral to membrane, GO:0030154: cell differentiation, GO:0046330: positive regulation of JNK cascade, GO:0051092: positive regulation of NF-kappaB transcription factor activi…	04060: Cytokine-cytokine receptor interaction
12723	1180	Clcn1	0.074633	0.587631	7.87361	chloride channel 1	GO:0005216: ion channel activity, GO:0005244: voltage-gated ion channel activity, GO:0005247: voltage-gated chloride channel activity, GO:0005254: chloride channel activity, GO:0006810: transport, GO:0006811: ion transport, GO:0006821: chloride transport, GO:0006821: chloride transport, GO:0006821: chloride transport, GO:0016020: membrane, GO:0016021: integral to membrane, GO:0019227: neuronal ac…
12372	844	Casq1	0.0498199	0.384402	7.71583	calsequestrin 1	GO:0005509: calcium ion binding, GO:0005622: intracellular, GO:0005737: cytoplasm, GO:0005739: mitochondrion, GO:0005794: Golgi apparatus, GO:0006937: regulation of muscle contraction, GO:0007029: endoplasmic reticulum organization, GO:0009408: response to heat, GO:0010880: regulation of release of sequestered calcium ion into cytosol by sarcoplasmic reticulum, GO:0010880: regulation of release o…
26874	225	Abcd2	0.084213	0.640862	7.61002	ATP-binding cassette, sub-family D (ALD), member 2	GO:0000038: very long-chain fatty acid metabolic process, GO:0000166: nucleotide binding, GO:0005524: ATP binding, GO:0005739: mitochondrion, GO:0005777: peroxisome, GO:0005778: peroxisomal membrane, GO:0006200: ATP catabolic process, GO:0006635: fatty acid beta-oxidation, GO:0006635: fatty acid beta-oxidation, GO:0006810: transport, GO:0008152: metabolic process, GO:0016020: membrane, GO:0016021…	02010: ABC transporters, 04146: Peroxisome
13170	1628	Dbp	0.0699205	0.464307	6.64049	D site albumin promoter binding protein	GO:0000977: RNA polymerase II regulatory region sequence-specific DNA binding, GO:0001077: RNA polymerase II core promoter proximal region sequence-specific DNA binding transcription factor activity involved in positive regulation of transcription, GO:0003677: DNA binding, GO:0003700: sequence-specific DNA binding transcription factor activity, GO:0005634: nucleus, GO:0006351: transcription, DNA-…
320502	56203	Lmod3	0.107798	0.697268	6.46827	leiomodin 3 (fetal)	GO:0003674: molecular_function, GO:0005575: cellular_component, GO:0008150: biological_process
320997	126410	Cyp4f39	0.0533464	0.331676	6.2174	cytochrome P450, family 4, subfamily f, polypeptide 39	GO:0003674: molecular_function, GO:0004497: monooxygenase activity, GO:0005575: cellular_component, GO:0008150: biological_process, GO:0016491: oxidoreductase activity, GO:0046872: metal ion binding, GO:0055114: oxidation-reduction process
20913	252983	Stxbp4	0.142916	0.863236	6.04017	syntaxin binding protein 4	GO:0005509: calcium ion binding, GO:0005515: protein binding, GO:0005622: intracellular, GO:0005634: nucleus, GO:0005737: cytoplasm, GO:0006605: protein targeting, GO:0008286: insulin receptor signaling pathway, GO:0015758: glucose transport, GO:0045111: intermediate filament cytoskeleton
622283		Gm6307	0.101896	0.557796	5.47418	predicted gene 6307	GO:0003674: molecular_function, GO:0005575: cellular_component, GO:0008150: biological_process
67866	58189	Wfdc1	0.0842849	0.446446	5.29687	WAP four-disulfide core domain 1	GO:0001558: regulation of cell growth, GO:0003674: molecular_function, GO:0004867: serine-type endopeptidase inhibitor activity, GO:0005576: extracellular region, GO:0005615: extracellular space, GO:0010466: negative regulation of peptidase activity, GO:0010951: negative regulation of endopeptidase activity, GO:0030414: peptidase inhibitor activity, GO:0050680: negative regulation of epithelial c…
100043600		Gm4544	0.401423	2.12524	5.29428	predicted gene 4544
69642	90523	2310046A06Rik	0.269189	1.41114	5.24219	RIKEN cDNA 2310046A06 gene	GO:0003674: molecular_function, GO:0005634: nucleus, GO:0005635: nuclear envelope, GO:0008150: biological_process, GO:0016605: PML body, GO:0031981: nuclear lumen
20360	10500	Sema6c	0.122258	0.614753	5.02834	sema domain, transmembrane domain (TM), and cytoplasmic domain, (semaphorin) 6C	GO:0004872: receptor activity, GO:0005886: plasma membrane, GO:0007275: multicellular organismal development, GO:0007399: nervous system development, GO:0007411: axon guidance, GO:0016020: membrane, GO:0016021: integral to membrane, GO:0030154: cell differentiation, GO:0030215: semaphorin receptor binding	04360: Axon guidance
11600	284	Angpt1	0.124383	0.61562	4.94938	angiopoietin 1	GO:0001525: angiogenesis, GO:0001525: angiogenesis, GO:0001541: ovarian follicle development, GO:0001569: patterning of blood vessels, GO:0001570: vasculogenesis, GO:0001701: in utero embryonic development, GO:0001701: in utero embryonic development, GO:0002040: sprouting angiogenesis, GO:0002092: positive regulation of receptor internalization, GO:0003160: endocardium morphogenesis, GO:0005102: …	05323: Rheumatoid arthritis
17260	4208	Mef2c	0.109868	0.54075	4.92183	myocyte enhancer factor 2C	GO:0000122: negative regulation of transcription from RNA polymerase II promoter, GO:0000122: negative regulation of transcription from RNA polymerase II promoter, GO:0000165: MAPK cascade, GO:0000165: MAPK cascade, GO:0000165: MAPK cascade, GO:0000977: RNA polymerase II regulatory region sequence-specific DNA binding, GO:0000977: RNA polymerase II regulatory region sequence-specific DNA binding,…	04010: MAPK signaling pathway
69576	255798	2310010M20Rik	0.112183	0.54715	4.87728	RIKEN cDNA 2310010M20 gene	GO:0003674: molecular_function, GO:0005575: cellular_component, GO:0008150: biological_process
723959		Mir1a-2	0.218545	1.06444	4.87058	microRNA 1a-2	GO:0006417: regulation of translation, GO:0010608: posttranscriptional regulation of gene expression, GO:0010629: negative regulation of gene expression, GO:0035195: gene silencing by miRNA, GO:0070884: regulation of calcineurin-NFAT signaling cascade
67620	55805	Lrp2bp	0.222374	1.06279	4.77926	Lrp2 binding protein	GO:0005515: protein binding, GO:0005737: cytoplasm, GO:0008150: biological_process
545798	387890	Tmem233	0.0697039	0.330491	4.74136	transmembrane protein 233	GO:0003674: molecular_function, GO:0005575: cellular_component, GO:0008150: biological_process, GO:0009607: response to biotic stimulus, GO:0016020: membrane, GO:0016021: integral to membrane
17306	284612	Sypl2	0.119374	0.558595	4.67938	synaptophysin-like 2	GO:0005215: transporter activity, GO:0006810: transport, GO:0006874: cellular calcium ion homeostasis, GO:0008021: synaptic vesicle, GO:0016020: membrane, GO:0016021: integral to membrane
20378	2487	Frzb	0.0413028	0.183299	4.43794	frizzled-related protein	GO:0001944: vasculature development, GO:0005515: protein binding, GO:0005576: extracellular region, GO:0005615: extracellular space, GO:0005615: extracellular space, GO:0005737: cytoplasm, GO:0006357: regulation of transcription from RNA polymerase II promoter, GO:0007165: signal transduction, GO:0007275: multicellular organismal development, GO:0007420: brain development, GO:0008285: negative re…
14385	2542	Slc37a4	0.0757157	0.334288	4.41505	solute carrier family 37 (glucose-6-phosphate transporter), member 4	GO:0001780: neutrophil homeostasis, GO:0001816: cytokine production, GO:0002318: myeloid progenitor cell differentiation, GO:0005977: glycogen metabolic process, GO:0006089: lactate metabolic process, GO:0006641: triglyceride metabolic process, GO:0006874: cellular calcium ion homeostasis, GO:0008202: steroid metabolic process, GO:0014070: response to organic cyclic compound, GO:0015152: glucose-…	04973: Carbohydrate digestion and absorption
18682	5260	Phkg1	0.0994052	0.436844	4.39458	phosphorylase kinase gamma 1	GO:0000166: nucleotide binding, GO:0004672: protein kinase activity, GO:0004674: protein serine/threonine kinase activity, GO:0004689: phosphorylase kinase activity, GO:0005516: calmodulin binding, GO:0005524: ATP binding, GO:0005964: phosphorylase kinase complex, GO:0005975: carbohydrate metabolic process, GO:0005977: glycogen metabolic process, GO:0005978: glycogen biosynthetic process, GO:0006…	04020: Calcium signaling pathway, 04910: Insulin signaling pathway
381511	54704	Pdp1	0.128178	0.556685	4.34306	pyruvate dehyrogenase phosphatase catalytic subunit 1	GO:0000287: magnesium ion binding, GO:0003824: catalytic activity, GO:0004721: phosphoprotein phosphatase activity, GO:0004722: protein serine/threonine phosphatase activity, GO:0004724: magnesium-dependent protein serine/threonine phosphatase activity, GO:0004741: [pyruvate dehydrogenase (lipoamide)] phosphatase activity, GO:0005509: calcium ion binding, GO:0005739: mitochondrion, GO:0005739: mi…
110893	6547	Slc8a3	0.228572	0.9878	4.32162	solute carrier family 8 (sodium/calcium exchanger), member 3	GO:0005432: calcium:sodium antiporter activity, GO:0005739: mitochondrion, GO:0005874: microtubule, GO:0005886: plasma membrane, GO:0005887: integral to plasma membrane, GO:0006814: sodium ion transport, GO:0015368: calcium:cation antiporter activity, GO:0016020: membrane, GO:0016021: integral to membrane, GO:0030001: metal ion transport, GO:0042383: sarcolemma, GO:0042995: cell projection, GO:00…	04020: Calcium signaling pathway, 04974: Protein digestion and absorption
74843	118490	Zmynd17	0.106919	0.45831	4.2865	zinc finger, MYND domain containing 17	GO:0003674: molecular_function, GO:0005575: cellular_component, GO:0008150: biological_process, GO:0008270: zinc ion binding, GO:0046872: metal ion binding
75430		3200002M19Rik	0.46923	1.99779	4.2576	RIKEN cDNA 3200002M19 gene	GO:0003674: molecular_function, GO:0005622: intracellular, GO:0005680: anaphase-promoting complex, GO:0007049: cell cycle, GO:0007067: mitosis, GO:0051301: cell division, GO:0090266: regulation of mitotic cell cycle spindle assembly checkpoint
11829	361	Aqp4	0.066527	0.277769	4.17528	aquaporin 4	GO:0005215: transporter activity, GO:0005737: cytoplasm, GO:0005737: cytoplasm, GO:0005886: plasma membrane, GO:0005886: plasma membrane, GO:0005887: integral to plasma membrane, GO:0005887: integral to plasma membrane, GO:0005911: cell-cell junction, GO:0006810: transport, GO:0006833: water transport, GO:0006833: water transport, GO:0006833: water transport, GO:0007605: sensory perception of sou…	04962: Vasopressin-regulated water reabsorption, 04976: Bile secretion
12151	100532731	Bmi1	0.482971	2.00859	4.15883	Bmi1 polycomb ring finger oncogene	GO:0000122: negative regulation of transcription from RNA polymerase II promoter, GO:0000122: negative regulation of transcription from RNA polymerase II promoter, GO:0000122: negative regulation of transcription from RNA polymerase II promoter, GO:0000151: ubiquitin ligase complex, GO:0000151: ubiquitin ligase complex, GO:0001501: skeletal system development, GO:0001701: in utero embryonic devel…
16420	3694	Itgb6	0.051659	0.21392	4.141	integrin beta 6	GO:0004872: receptor activity, GO:0005102: receptor binding, GO:0005178: integrin binding, GO:0006954: inflammatory response, GO:0007155: cell adhesion, GO:0007160: cell-matrix adhesion, GO:0007229: integrin-mediated signaling pathway, GO:0007275: multicellular organismal development, GO:0008305: integrin complex, GO:0016020: membrane, GO:0016021: integral to membrane	04510: Focal adhesion, 04512: ECM-receptor interaction, 04810: Regulation of actin cytoskeleton, 05410: Hypertrophic cardiomyopathy (HCM), 05412: Arrhythmogenic right ventricular cardiomyopathy (ARVC), 05414: Dilated cardiomyopathy
639396		Gm7265	0.274708	1.12853	4.1081	predicted gene 7265
382427	144453	Best3	0.128166	0.523265	4.08273	bestrophin 3	GO:0005216: ion channel activity, GO:0005254: chloride channel activity, GO:0005886: plasma membrane, GO:0006810: transport, GO:0006811: ion transport, GO:0006821: chloride transport, GO:0015698: inorganic anion transport, GO:0016020: membrane, GO:0016021: integral to membrane, GO:0034220: ion transmembrane transport, GO:0034707: chloride channel complex, GO:0043271: negative regulation of ion tr…
381836	646643	Sbk2	0.25989	1.04894	4.03609	SH3-binding domain kinase family, member 2	GO:0000166: nucleotide binding, GO:0003674: molecular_function, GO:0004674: protein serine/threonine kinase activity, GO:0005524: ATP binding, GO:0005575: cellular_component, GO:0008150: biological_process
68460	201140	Dhrs7c	0.20485	0.818292	3.99459	dehydrogenase/reductase (SDR family) member 7C	GO:0000166: nucleotide binding, GO:0004745: retinol dehydrogenase activity, GO:0005576: extracellular region, GO:0008152: metabolic process, GO:0010880: regulation of release of sequestered calcium ion into cytosol by sarcoplasmic reticulum, GO:0014801: longitudinal sarcoplasmic reticulum, GO:0016491: oxidoreductase activity, GO:0033017: sarcoplasmic reticulum membrane, GO:0055114: oxidation-redu…
387136		Mir1a-1	0.162257	0.633884	3.90666	microRNA 1a-1	GO:0010608: posttranscriptional regulation of gene expression, GO:0010629: negative regulation of gene expression, GO:0017148: negative regulation of translation, GO:0035195: gene silencing by miRNA, GO:0070884: regulation of calcineurin-NFAT signaling cascade
224419		ORF63	0.0585225	0.228615	3.90645	open reading frame 63	GO:0003674: molecular_function, GO:0005634: nucleus, GO:0005829: cytosol, GO:0008150: biological_process
56534	8988	Hspb3	0.150398	0.579014	3.84989	heat shock protein 3	GO:0005634: nucleus, GO:0005737: cytoplasm, GO:0006950: response to stress
723954		Mir133a-2	0.208081	0.79327	3.81232	microRNA 133a-2	GO:0010629: negative regulation of gene expression, GO:0035195: gene silencing by miRNA, GO:0045668: negative regulation of osteoblast differentiation, GO:0060043: regulation of cardiac muscle cell proliferation, GO:0070482: response to oxygen levels
100502774		Gm19363	0.11251	0.428893	3.81205	predicted gene, 19363
14431	2593	Gamt	0.0872257	0.326513	3.74331	guanidinoacetate methyltransferase	GO:0006601: creatine biosynthetic process, GO:0006601: creatine biosynthetic process, GO:0007283: spermatogenesis, GO:0008168: methyltransferase activity, GO:0008757: S-adenosylmethionine-dependent methyltransferase activity, GO:0009887: organ morphogenesis, GO:0016740: transferase activity, GO:0030731: guanidinoacetate N-methyltransferase activity, GO:0032259: methylation, GO:0040014: regulation…	00260: Glycine, serine and threonine metabolism, 00330: Arginine and proline metabolism, 01100: Metabolic pathways
328399		A930018M24Rik	0.227441	0.847667	3.72697	RIKEN cDNA A930018M24 gene	GO:0003674: molecular_function, GO:0005575: cellular_component, GO:0008150: biological_process
241113	53632	Prkag3	0.101237	0.375816	3.71225	protein kinase, AMP-activated, gamma 3 non-catatlytic subunit	GO:0000166: nucleotide binding, GO:0004679: AMP-activated protein kinase activity, GO:0005524: ATP binding, GO:0005978: glycogen biosynthetic process, GO:0006633: fatty acid biosynthetic process, GO:0008610: lipid biosynthetic process, GO:0015758: glucose transport, GO:0019901: protein kinase binding, GO:0031588: AMP-activated protein kinase complex	04910: Insulin signaling pathway, 04920: Adipocytokine signaling pathway, 05410: Hypertrophic cardiomyopathy (HCM)
100503636		1700123M08Rik	0.231571	0.859377	3.71107	RIKEN cDNA 1700123M08 gene
667307		Gm8564	0.448966	1.65649	3.68958	ribosomal protein L32 pseudogene
15473	10247	Hrsp12	0.224399	0.827433	3.68733	heat-responsive protein 12	GO:0004518: nuclease activity, GO:0004519: endonuclease activity, GO:0005634: nucleus, GO:0005737: cytoplasm, GO:0005739: mitochondrion, GO:0008152: metabolic process, GO:0016787: hydrolase activity, GO:0090305: nucleic acid phosphodiester bond hydrolysis
11811	10930	Apobec2	0.217482	0.794013	3.65093	apolipoprotein B mRNA editing enzyme, catalytic polypeptide 2	GO:0003824: catalytic activity, GO:0006397: mRNA processing, GO:0008270: zinc ion binding, GO:0016556: mRNA modification, GO:0016787: hydrolase activity, GO:0016814: hydrolase activity, acting on carbon-nitrogen (but not peptide) bonds, in cyclic amidines, GO:0046872: metal ion binding, GO:0080111: DNA demethylation
16431	9452	Itm2a	0.100295	0.365636	3.64562	integral membrane protein 2A	GO:0016020: membrane, GO:0016021: integral to membrane
13400	1760	Dmpk	0.268159	0.960363	3.58132	dystrophia myotonica-protein kinase	GO:0000166: nucleotide binding, GO:0002028: regulation of sodium ion transport, GO:0004672: protein kinase activity, GO:0004674: protein serine/threonine kinase activity, GO:0005524: ATP binding, GO:0005622: intracellular, GO:0005634: nucleus, GO:0005737: cytoplasm, GO:0005739: mitochondrion, GO:0005741: mitochondrial outer membrane, GO:0005783: endoplasmic reticulum, GO:0005789: endoplasmic reti…
67266	388650	Fam69a	0.210568	0.749356	3.55874	family with sequence similarity 69, member A	GO:0005515: protein binding, GO:0005575: cellular_component, GO:0005783: endoplasmic reticulum, GO:0008150: biological_process, GO:0016020: membrane, GO:0016021: integral to membrane
12373	845	Casq2	0.254182	0.902322	3.5499	calsequestrin 2	GO:0002027: regulation of heart rate, GO:0005080: protein kinase C binding, GO:0005509: calcium ion binding, GO:0005622: intracellular, GO:0005622: intracellular, GO:0006937: regulation of muscle contraction, GO:0010649: regulation of cell communication by electrical coupling, GO:0010881: regulation of cardiac muscle contraction by regulation of the release of sequestered calcium ion, GO:0010881:…
12295	782	Cacnb1	0.349927	1.23625	3.53287	calcium channel, voltage-dependent, beta 1 subunit	GO:0005216: ion channel activity, GO:0005244: voltage-gated ion channel activity, GO:0005245: voltage-gated calcium channel activity, GO:0005245: voltage-gated calcium channel activity, GO:0005245: voltage-gated calcium channel activity, GO:0005262: calcium channel activity, GO:0005515: protein binding, GO:0005622: intracellular, GO:0005886: plasma membrane, GO:0005891: voltage-gated calcium chan…	04010: MAPK signaling pathway, 04260: Cardiac muscle contraction, 05410: Hypertrophic cardiomyopathy (HCM), 05412: Arrhythmogenic right ventricular cardiomyopathy (ARVC), 05414: Dilated cardiomyopathy
18105	4835	Nqo2	0.236213	0.827417	3.50284	NAD(P)H dehydrogenase, quinone 2	GO:0001512: dihydronicotinamide riboside quinone reductase activity, GO:0005634: nucleus, GO:0005737: cytoplasm, GO:0016491: oxidoreductase activity, GO:0046872: metal ion binding, GO:0055114: oxidation-reduction process
69585	148738	Hfe2	0.205164	0.715032	3.48517	hemochromatosis type 2 (juvenile) (human homolog)	GO:0005515: protein binding, GO:0005615: extracellular space, GO:0005886: plasma membrane, GO:0009986: cell surface, GO:0015026: coreceptor activity, GO:0016020: membrane, GO:0016323: basolateral plasma membrane, GO:0030509: BMP signaling pathway, GO:0030509: BMP signaling pathway, GO:0031225: anchored to membrane, GO:0045944: positive regulation of transcription from RNA polymerase II promoter, …
229665	270	Ampd1	0.194755	0.676345	3.4728	adenosine monophosphate deaminase 1	GO:0005575: cellular_component, GO:0010033: response to organic substance, GO:0032036: myosin heavy chain binding	00230: Purine metabolism, 01100: Metabolic pathways
14555	2819	Gpd1	0.124273	0.42947	3.45587	glycerol-3-phosphate dehydrogenase 1 (soluble)	GO:0000166: nucleotide binding, GO:0004367: glycerol-3-phosphate dehydrogenase [NAD+] activity, GO:0004368: glycerol-3-phosphate dehydrogenase activity, GO:0004368: glycerol-3-phosphate dehydrogenase activity, GO:0005737: cytoplasm, GO:0005739: mitochondrion, GO:0005829: cytosol, GO:0005975: carbohydrate metabolic process, GO:0006072: glycerol-3-phosphate metabolic process, GO:0006072: glycerol-3…	00564: Glycerophospholipid metabolism
431706	81931	Zfp457	0.30534	1.04162	3.41136	zinc finger protein 457	GO:0003674: molecular_function, GO:0005575: cellular_component, GO:0008150: biological_process, GO:0046872: metal ion binding
100039571		Gm10335	0.407958	1.37551	3.37168	ribosomal protein L23A pseudogene	GO:0003674: molecular_function, GO:0005575: cellular_component, GO:0005840: ribosome, GO:0008150: biological_process, GO:0030529: ribonucleoprotein complex
78749	11259	Filip1l	0.127362	0.428905	3.3676	filamin A interacting protein 1-like	GO:0003674: molecular_function, GO:0005575: cellular_component, GO:0005634: nucleus, GO:0005737: cytoplasm, GO:0008150: biological_process, GO:0016020: membrane
68526	151556	Gpr155	0.266074	0.895339	3.365	G protein-coupled receptor 155	GO:0003674: molecular_function, GO:0005575: cellular_component, GO:0008150: biological_process
668923		Zfp442	0.261149	0.87563	3.35299	zinc finger protein 442	GO:0003674: molecular_function, GO:0005575: cellular_component, GO:0008150: biological_process, GO:0046872: metal ion binding
79362		Bhlhe41	0.0901863	0.298423	3.30896	basic helix-loop-helix family, member e41	GO:0000122: negative regulation of transcription from RNA polymerase II promoter, GO:0000122: negative regulation of transcription from RNA polymerase II promoter, GO:0000122: negative regulation of transcription from RNA polymerase II promoter, GO:0000978: RNA polymerase II core promoter proximal region sequence-specific DNA binding, GO:0000981: sequence-specific DNA binding RNA polymerase II tr…	04710: Circadian rhythm - mammal
11932	482	Atp1b2	0.176064	0.579942	3.29392	ATPase, Na+/K+ transporting, beta 2 polypeptide	GO:0005391: sodium:potassium-exchanging ATPase activity, GO:0005737: cytoplasm, GO:0006200: ATP catabolic process, GO:0006810: transport, GO:0006811: ion transport, GO:0006813: potassium ion transport, GO:0006814: sodium ion transport, GO:0007155: cell adhesion, GO:0016020: membrane, GO:0016021: integral to membrane, GO:0016324: apical plasma membrane, GO:0046034: ATP metabolic process, GO:007143…	04260: Cardiac muscle contraction, 04960: Aldosterone-regulated sodium reabsorption, 04964: Proximal tubule bicarbonate reclamation, 04970: Salivary secretion, 04971: Gastric acid secretion, 04972: Pancreatic secretion, 04973: Carbohydrate digestion and absorption, 04974: Protein digestion and absorption, 04976: Bile secretion
16597	11278	Klf12	0.460571	1.47437	3.20119	Kruppel-like factor 12	GO:0000122: negative regulation of transcription from RNA polymerase II promoter, GO:0003676: nucleic acid binding, GO:0003677: DNA binding, GO:0003677: DNA binding, GO:0003677: DNA binding, GO:0003700: sequence-specific DNA binding transcription factor activity, GO:0003700: sequence-specific DNA binding transcription factor activity, GO:0005515: protein binding, GO:0005622: intracellular, GO:000…
109205	55084	Sobp	0.17053	0.544337	3.19202	sine oculis-binding protein homolog (Drosophila)	GO:0007605: sensory perception of sound, GO:0007626: locomotory behavior, GO:0042472: inner ear morphogenesis, GO:0046872: metal ion binding
12322	815	Camk2a	0.232805	0.742058	3.18747	calcium/calmodulin-dependent protein kinase II alpha	GO:0000082: G1/S transition of mitotic cell cycle, GO:0000166: nucleotide binding, GO:0004672: protein kinase activity, GO:0004674: protein serine/threonine kinase activity, GO:0004683: calmodulin-dependent protein kinase activity, GO:0005515: protein binding, GO:0005516: calmodulin binding, GO:0005524: ATP binding, GO:0005737: cytoplasm, GO:0005886: plasma membrane, GO:0005954: calcium- and calm…	04012: ErbB signaling pathway, 04020: Calcium signaling pathway, 04114: Oocyte meiosis, 04310: Wnt signaling pathway, 04720: Long-term potentiation, 04722: Neurotrophin signaling pathway, 04740: Olfactory transduction, 04912: GnRH signaling pathway, 04916: Melanogenesis, 04971: Gastric acid secretion, 05214: Glioma
11423	43	Ache	0.223486	0.707609	3.16623	acetylcholinesterase	GO:0001919: regulation of receptor recycling, GO:0003990: acetylcholinesterase activity, GO:0003990: acetylcholinesterase activity, GO:0004091: carboxylesterase activity, GO:0004104: cholinesterase activity, GO:0004104: cholinesterase activity, GO:0005518: collagen binding, GO:0005576: extracellular region, GO:0005605: basal lamina, GO:0005615: extracellular space, GO:0005635: nuclear envelope, G…	00564: Glycerophospholipid metabolism
381792		2310040G24Rik	0.155355	0.48439	3.11795	RIKEN cDNA 2310040G24 gene
330256		Gm20559	0.337383	1.04708	3.10353	predicted gene, 20559
26549	26548	Itgb1bp2	0.166644	0.51492	3.08994	integrin beta 1 binding protein 2	GO:0005178: integrin binding, GO:0005509: calcium ion binding, GO:0007229: integrin-mediated signaling pathway, GO:0008270: zinc ion binding, GO:0017124: SH3 domain binding, GO:0030018: Z disc, GO:0046872: metal ion binding
20348	10512	Sema3c	0.211358	0.652246	3.08598	sema domain, immunoglobulin domain (Ig), short basic domain, secreted, (semaphorin) 3C	GO:0001755: neural crest cell migration, GO:0001974: blood vessel remodeling, GO:0004872: receptor activity, GO:0005576: extracellular region, GO:0005615: extracellular space, GO:0007275: multicellular organismal development, GO:0007399: nervous system development, GO:0007411: axon guidance, GO:0007507: heart development, GO:0009791: post-embryonic development, GO:0016020: membrane, GO:0030154: c…	04360: Axon guidance
12922	1395	Crhr2	0.222769	0.683014	3.06603	corticotropin releasing hormone receptor 2	GO:0004871: signal transducer activity, GO:0004930: G-protein coupled receptor activity, GO:0005179: hormone activity, GO:0005515: protein binding, GO:0005783: endoplasmic reticulum, GO:0005791: rough endoplasmic reticulum, GO:0005794: Golgi apparatus, GO:0005794: Golgi apparatus, GO:0005886: plasma membrane, GO:0007015: actin filament organization, GO:0007165: signal transduction, GO:0007186: G-…	04080: Neuroactive ligand-receptor interaction
403183		4832428D23Rik	0.0548218	0.167417	3.05385	RIKEN cDNA 4832428D23 gene	GO:0003674: molecular_function, GO:0005575: cellular_component, GO:0008150: biological_process, GO:0008168: methyltransferase activity, GO:0016740: transferase activity, GO:0032259: methylation
16716	339855	Ky	0.0481867	0.145629	3.02217	kyphoscoliosis peptidase	GO:0007517: muscle organ development, GO:0007528: neuromuscular junction development
12391	859	Cav3	0.30509	0.91799	3.00892	caveolin 3	GO:0001778: plasma membrane repair, GO:0005515: protein binding, GO:0005737: cytoplasm, GO:0005794: Golgi apparatus, GO:0005886: plasma membrane, GO:0005886: plasma membrane, GO:0005901: caveola, GO:0005901: caveola, GO:0006469: negative regulation of protein kinase activity, GO:0006641: triglyceride metabolic process, GO:0006897: endocytosis, GO:0006897: endocytosis, GO:0007009: plasma membrane …	04144: Endocytosis, 04510: Focal adhesion, 05100: Bacterial invasion of epithelial cells
240168	25780	Rasgrp3	0.140411	0.420252	2.99301	RAS, guanyl releasing protein 3	GO:0005085: guanyl-nucleotide exchange factor activity, GO:0005088: Ras guanyl-nucleotide exchange factor activity, GO:0005737: cytoplasm, GO:0007265: Ras protein signal transduction, GO:0017016: Ras GTPase binding, GO:0017016: Ras GTPase binding, GO:0019900: kinase binding, GO:0032045: guanyl-nucleotide exchange factor complex, GO:0032854: positive regulation of Rap GTPase activity, GO:0043087: …	04010: MAPK signaling pathway, 04662: B cell receptor signaling pathway
18600	11240	Padi2	0.377955	1.13084	2.99198	peptidyl arginine deiminase, type II	GO:0004668: protein-arginine deiminase activity, GO:0005509: calcium ion binding, GO:0005737: cytoplasm, GO:0006464: cellular protein modification process, GO:0016787: hydrolase activity, GO:0018101: peptidyl-citrulline biosynthetic process from peptidyl-arginine
399548	6330	Scn4b	0.217462	0.649965	2.98887	sodium channel, type IV, beta	GO:0001518: voltage-gated sodium channel complex, GO:0001518: voltage-gated sodium channel complex, GO:0005216: ion channel activity, GO:0005244: voltage-gated ion channel activity, GO:0005248: voltage-gated sodium channel activity, GO:0005248: voltage-gated sodium channel activity, GO:0005248: voltage-gated sodium channel activity, GO:0005272: sodium channel activity, GO:0005886: plasma membrane…
93713	56110	Pcdhga5	0.398648	1.18831	2.98085	protocadherin gamma subfamily A, 5	GO:0003674: molecular_function, GO:0005886: plasma membrane, GO:0007155: cell adhesion, GO:0016020: membrane, GO:0016021: integral to membrane
268670		Zfp759	0.218356	0.650166	2.97756	zinc finger protein 759	GO:0003674: molecular_function, GO:0005575: cellular_component, GO:0008150: biological_process, GO:0046872: metal ion binding
73284	115265	Ddit4l	0.208695	0.619736	2.96957	DNA-damage-inducible transcript 4-like	GO:0003674: molecular_function, GO:0005575: cellular_component, GO:0005737: cytoplasm, GO:0008150: biological_process, GO:0009968: negative regulation of signal transduction
67484	80820	Eepd1	0.249708	0.740538	2.96561	endonuclease/exonuclease/phosphatase family domain containing 1	GO:0003677: DNA binding, GO:0005575: cellular_component, GO:0006281: DNA repair, GO:0008150: biological_process
14735	2239	Gpc4	0.392602	1.16403	2.96492	glypican 4	GO:0005576: extracellular region, GO:0005578: proteinaceous extracellular matrix, GO:0005886: plasma membrane, GO:0009897: external side of plasma membrane, GO:0016020: membrane, GO:0031225: anchored to membrane, GO:0043395: heparan sulfate proteoglycan binding
68760	79933	Synpo2l	0.268664	0.793461	2.95336	synaptopodin 2-like	GO:0003674: molecular_function, GO:0003779: actin binding, GO:0005575: cellular_component, GO:0005737: cytoplasm, GO:0005856: cytoskeleton, GO:0008150: biological_process
71998	399512	Slc25a35	0.290873	0.855461	2.94101	solute carrier family 25, member 35	GO:0003674: molecular_function, GO:0005739: mitochondrion, GO:0005743: mitochondrial inner membrane, GO:0006810: transport, GO:0008150: biological_process, GO:0016020: membrane, GO:0016021: integral to membrane
100504160		Gm20094	0.373376	1.0775	2.88582	predicted gene, 20094
14860		Gsta4	0.20801	0.599448	2.88183	glutathione S-transferase, alpha 4	GO:0004364: glutathione transferase activity, GO:0004364: glutathione transferase activity, GO:0005737: cytoplasm, GO:0005739: mitochondrion, GO:0006749: glutathione metabolic process, GO:0006805: xenobiotic metabolic process, GO:0008144: drug binding, GO:0008152: metabolic process, GO:0016740: transferase activity, GO:0042803: protein homodimerization activity, GO:0043295: glutathione binding	00480: Glutathione metabolism, 00980: Metabolism of xenobiotics by cytochrome P450, 00982: Drug metabolism - cytochrome P450
94089	81786	Trim7	0.0692505	0.199325	2.87832	tripartite motif-containing 7	GO:0005622: intracellular, GO:0005634: nucleus, GO:0005634: nucleus, GO:0005737: cytoplasm, GO:0005737: cytoplasm, GO:0008150: biological_process, GO:0008270: zinc ion binding, GO:0043231: intracellular membrane-bounded organelle, GO:0046872: metal ion binding
212448	9729	9330159F19Rik	0.150725	0.429313	2.84832	RIKEN cDNA 9330159F19 gene	GO:0003674: molecular_function, GO:0005575: cellular_component, GO:0008150: biological_process
16651	8082	Sspn	0.26635	0.757178	2.84279	sarcospan	GO:0005886: plasma membrane, GO:0016020: membrane, GO:0016021: integral to membrane, GO:0030054: cell junction, GO:0030133: transport vesicle, GO:0042383: sarcolemma, GO:0045202: synapse, GO:0045211: postsynaptic membrane
628007		Gm6825	0.264375	0.747727	2.82828	predicted gene 6825
64082	64091	Popdc2	0.276977	0.782993	2.82693	popeye domain containing 2	GO:0003674: molecular_function, GO:0008150: biological_process, GO:0016020: membrane, GO:0016021: integral to membrane
208372	401036	Asb18	0.265425	0.748927	2.82161	ankyrin repeat and SOCS box-containing 18	GO:0003674: molecular_function, GO:0005575: cellular_component, GO:0005622: intracellular, GO:0008150: biological_process, GO:0035556: intracellular signal transduction
226922	56479	Kcnq5	0.400201	1.12692	2.8159	potassium voltage-gated channel, subfamily Q, member 5	GO:0005216: ion channel activity, GO:0005244: voltage-gated ion channel activity, GO:0005249: voltage-gated potassium channel activity, GO:0005249: voltage-gated potassium channel activity, GO:0005267: potassium channel activity, GO:0006810: transport, GO:0006811: ion transport, GO:0006813: potassium ion transport, GO:0006813: potassium ion transport, GO:0008076: voltage-gated potassium channel c…
72139		2610044O15Rik	0.419557	1.17747	2.80646	RIKEN cDNA 2610044O15 gene	GO:0003674: molecular_function, GO:0005575: cellular_component, GO:0008150: biological_process
238161	9472	Akap6	0.164481	0.460472	2.79955	A kinase (PRKA) anchor protein 6	GO:0005102: receptor binding, GO:0005634: nucleus, GO:0005635: nuclear envelope, GO:0005640: nuclear outer membrane, GO:0005737: cytoplasm, GO:0010738: regulation of protein kinase A signaling cascade, GO:0016529: sarcoplasmic reticulum, GO:0019899: enzyme binding, GO:0031965: nuclear membrane, GO:0032514: positive regulation of protein phosphatase type 2B activity, GO:0032947: protein complex sc…
69563		2310015B20Rik	0.18084	0.496906	2.74777	RIKEN cDNA 2310015B20 gene	GO:0003674: molecular_function, GO:0005575: cellular_component, GO:0008150: biological_process
56043	83592	Akr1e1	0.236392	0.649396	2.74712	aldo-keto reductase family 1, member E1	GO:0005737: cytoplasm, GO:0016491: oxidoreductase activity, GO:0050571: 1,5-anhydro-D-fructose reductase activity, GO:0055114: oxidation-reduction process
13631	29904	Eef2k	0.466505	1.27585	2.73491	eukaryotic elongation factor-2 kinase	GO:0000166: nucleotide binding, GO:0004674: protein serine/threonine kinase activity, GO:0004686: elongation factor-2 kinase activity, GO:0004686: elongation factor-2 kinase activity, GO:0005509: calcium ion binding, GO:0005516: calmodulin binding, GO:0005516: calmodulin binding, GO:0005524: ATP binding, GO:0006414: translational elongation, GO:0006468: protein phosphorylation, GO:0008135: transl…
54381	10404	Pgcp	0.169066	0.461509	2.72976	plasma glutamate carboxypeptidase	GO:0004180: carboxypeptidase activity, GO:0005576: extracellular region, GO:0005615: extracellular space, GO:0005737: cytoplasm, GO:0005764: lysosome, GO:0005783: endoplasmic reticulum, GO:0005794: Golgi apparatus, GO:0006508: proteolysis, GO:0006590: thyroid hormone generation, GO:0008152: metabolic process, GO:0008233: peptidase activity, GO:0008237: metallopeptidase activity, GO:0016787: hydro…
20649	6641	Sntb1	0.488985	1.33425	2.72861	syntrophin, basic 1	GO:0003779: actin binding, GO:0005515: protein binding, GO:0005516: calmodulin binding, GO:0005543: phospholipid binding, GO:0005737: cytoplasm, GO:0005856: cytoskeleton, GO:0005886: plasma membrane, GO:0016020: membrane, GO:0030054: cell junction, GO:0030165: PDZ domain binding, GO:0043234: protein complex, GO:0045202: synapse
18628	8863	Per3	0.360767	0.980761	2.71854	period homolog 3 (Drosophila)	GO:0000122: negative regulation of transcription from RNA polymerase II promoter, GO:0004871: signal transducer activity, GO:0005515: protein binding, GO:0005634: nucleus, GO:0005737: cytoplasm, GO:0006351: transcription, DNA-dependent, GO:0006355: regulation of transcription, DNA-dependent, GO:0007165: signal transduction, GO:0007623: circadian rhythm, GO:0048511: rhythmic process	04710: Circadian rhythm - mammal
677289		Gm14492	0.268978	0.730586	2.71616	predicted gene 14492	GO:0003674: molecular_function, GO:0005575: cellular_component, GO:0008150: biological_process
66958	51075	Tmx2	0.188384	0.511264	2.71395	thioredoxin-related transmembrane protein 2	GO:0003674: molecular_function, GO:0005575: cellular_component, GO:0008150: biological_process, GO:0016020: membrane, GO:0016021: integral to membrane, GO:0045454: cell redox homeostasis
52250	65055	Reep1	0.210952	0.569292	2.69868	receptor accessory protein 1	GO:0005737: cytoplasm, GO:0005739: mitochondrion, GO:0005783: endoplasmic reticulum, GO:0008017: microtubule binding, GO:0016020: membrane, GO:0016021: integral to membrane, GO:0031849: olfactory receptor binding, GO:0051205: protein insertion into membrane, GO:0071786: endoplasmic reticulum tubular network organization
16706	8844	Ksr1	0.448573	1.20649	2.68961	kinase suppressor of ras 1	GO:0004672: protein kinase activity, GO:0004674: protein serine/threonine kinase activity, GO:0005078: MAP-kinase scaffold activity, GO:0005515: protein binding, GO:0005524: ATP binding, GO:0005737: cytoplasm, GO:0005783: endoplasmic reticulum, GO:0006468: protein phosphorylation, GO:0016020: membrane, GO:0016301: kinase activity, GO:0016310: phosphorylation, GO:0016772: transferase activity, tra…
235587	10039	Parp3	0.445829	1.19376	2.67762	poly (ADP-ribose) polymerase family, member 3	GO:0003674: molecular_function, GO:0005575: cellular_component, GO:0008150: biological_process, GO:0008152: metabolic process, GO:0016740: transferase activity	03410: Base excision repair
26360	23452	Angptl2	0.111757	0.298521	2.67117	angiopoietin-like 2	GO:0005102: receptor binding, GO:0005576: extracellular region, GO:0005615: extracellular space, GO:0007165: signal transduction
319415	222537	Hs3st5	0.339664	0.90686	2.66987	heparan sulfate (glucosamine) 3-O-sulfotransferase 5	GO:0005575: cellular_component, GO:0005794: Golgi apparatus, GO:0006477: protein sulfation, GO:0008146: sulfotransferase activity, GO:0008152: metabolic process, GO:0008467: [heparan sulfate]-glucosamine 3-sulfotransferase 1 activity, GO:0015015: heparan sulfate proteoglycan biosynthetic process, enzymatic modification, GO:0016020: membrane, GO:0016021: integral to membrane, GO:0016740: transfera…	00534: Glycosaminoglycan biosynthesis - heparan sulfate
68770	57157	Phtf2	0.292999	0.782193	2.66961	putative homeodomain transcription factor 2	GO:0003674: molecular_function, GO:0003677: DNA binding, GO:0005634: nucleus, GO:0005783: endoplasmic reticulum, GO:0006351: transcription, DNA-dependent, GO:0006355: regulation of transcription, DNA-dependent, GO:0008150: biological_process
50915	2888	Grb14	0.14489	0.386674	2.66874	growth factor receptor bound protein 14	GO:0005070: SH3/SH2 adaptor activity, GO:0005543: phospholipid binding, GO:0005737: cytoplasm, GO:0005768: endosome, GO:0005794: Golgi apparatus, GO:0005886: plasma membrane, GO:0007165: signal transduction, GO:0008286: insulin receptor signaling pathway, GO:0009967: positive regulation of signal transduction, GO:0016020: membrane, GO:0046627: negative regulation of insulin receptor signaling pat…
20266	6324	Scn1b	0.175973	0.468024	2.65963	sodium channel, voltage-gated, type I, beta	GO:0001518: voltage-gated sodium channel complex, GO:0005216: ion channel activity, GO:0005244: voltage-gated ion channel activity, GO:0005272: sodium channel activity, GO:0005515: protein binding, GO:0006810: transport, GO:0006811: ion transport, GO:0006814: sodium ion transport, GO:0007411: axon guidance, GO:0010976: positive regulation of neuron projection development, GO:0014704: intercalated…
72776	163786	Sass6	0.43909	1.16679	2.6573	spindle assembly 6 homolog (C. elegans)	GO:0003674: molecular_function, GO:0005737: cytoplasm, GO:0005813: centrosome, GO:0005814: centriole, GO:0005856: cytoskeleton, GO:0007049: cell cycle, GO:0007099: centriole replication, GO:0051298: centrosome duplication
12180	150572	Smyd1	0.271041	0.719868	2.65594	SET and MYND domain containing 1	GO:0003677: DNA binding, GO:0003714: transcription corepressor activity, GO:0005515: protein binding, GO:0005634: nucleus, GO:0005737: cytoplasm, GO:0006338: chromatin remodeling, GO:0006351: transcription, DNA-dependent, GO:0006355: regulation of transcription, DNA-dependent, GO:0007507: heart development, GO:0008270: zinc ion binding, GO:0045892: negative regulation of transcription, DNA-depend…
234353	23362	Psd3	0.213445	0.563667	2.64081	pleckstrin and Sec7 domain containing 3	GO:0005085: guanyl-nucleotide exchange factor activity, GO:0005086: ARF guanyl-nucleotide exchange factor activity, GO:0005543: phospholipid binding, GO:0005622: intracellular, GO:0005886: plasma membrane, GO:0016020: membrane, GO:0030054: cell junction, GO:0030182: neuron differentiation, GO:0032011: ARF protein signal transduction, GO:0032012: regulation of ARF protein signal transduction, GO:0…	04144: Endocytosis
56050	51302	Cyp39a1	0.385991	1.01773	2.63667	cytochrome P450, family 39, subfamily a, polypeptide 1	GO:0004497: monooxygenase activity, GO:0005506: iron ion binding, GO:0005783: endoplasmic reticulum, GO:0006629: lipid metabolic process, GO:0006699: bile acid biosynthetic process, GO:0006699: bile acid biosynthetic process, GO:0006707: cholesterol catabolic process, GO:0007586: digestion, GO:0008202: steroid metabolic process, GO:0008387: steroid 7-alpha-hydroxylase activity, GO:0008396: oxyste…	00120: Primary bile acid biosynthesis
68680	161247	Fitm1	0.311816	0.820152	2.63025	fat storage-inducing transmembrane protein 1	GO:0005783: endoplasmic reticulum, GO:0005789: endoplasmic reticulum membrane, GO:0010890: positive regulation of sequestering of triglyceride, GO:0016020: membrane, GO:0016021: integral to membrane, GO:0030176: integral to endoplasmic reticulum membrane, GO:0034389: lipid particle organization
246048	140578	Chodl	0.385876	1.01245	2.62378	chondrolectin	GO:0003674: molecular_function, GO:0005737: cytoplasm, GO:0008150: biological_process, GO:0048471: perinuclear region of cytoplasm
237611	246329	Stac3	0.176138	0.456801	2.59342	SH3 and cysteine rich domain 3	GO:0005575: cellular_component, GO:0005622: intracellular, GO:0008150: biological_process, GO:0035556: intracellular signal transduction, GO:0042802: identical protein binding, GO:0046872: metal ion binding
66271	84233	Tmem126a	0.263224	0.682272	2.59198	transmembrane protein 126A	GO:0003674: molecular_function, GO:0005739: mitochondrion, GO:0005739: mitochondrion, GO:0016020: membrane, GO:0016021: integral to membrane, GO:0021554: optic nerve development
68285		C630043F03Rik	0.304178	0.788401	2.59191	RIKEN cDNA C630043F03 gene	GO:0003674: molecular_function, GO:0005575: cellular_component, GO:0008150: biological_process
240879	149281	Mettl11b	0.120826	0.31273	2.58828	methyltransferase like 11B	GO:0003674: molecular_function, GO:0005575: cellular_component, GO:0008150: biological_process, GO:0008168: methyltransferase activity, GO:0016740: transferase activity, GO:0032259: methylation
75530	90624	Lyrm7	0.358536	0.924869	2.57957	LYR motif containing 7	GO:0003674: molecular_function, GO:0005739: mitochondrion, GO:0008150: biological_process
66795	83734	Atg10	0.432306	1.11277	2.57403	autophagy related 10	GO:0005515: protein binding, GO:0005622: intracellular, GO:0005737: cytoplasm, GO:0006497: protein lipidation, GO:0006810: transport, GO:0006914: autophagy, GO:0008152: metabolic process, GO:0008152: metabolic process, GO:0015031: protein transport, GO:0016874: ligase activity, GO:0019777: Atg12 ligase activity, GO:0031401: positive regulation of protein modification process, GO:0032446: protein …
319953	25809	Ttll1	0.389472	1.00201	2.57273	tubulin tyrosine ligase-like 1	GO:0003351: epithelial cilium movement, GO:0003674: molecular_function, GO:0004835: tubulin-tyrosine ligase activity, GO:0005524: ATP binding, GO:0005575: cellular_component, GO:0005737: cytoplasm, GO:0005856: cytoskeleton, GO:0005874: microtubule, GO:0006464: cellular protein modification process, GO:0016874: ligase activity, GO:0018095: protein polyglutamylation, GO:0035083: cilium axoneme asse…
12850	10229	Coq7	0.191475	0.490791	2.56322	demethyl-Q 7	GO:0001306: age-dependent response to oxidative stress, GO:0001701: in utero embryonic development, GO:0001841: neural tube formation, GO:0005634: nucleus, GO:0005739: mitochondrion, GO:0005739: mitochondrion, GO:0005743: mitochondrial inner membrane, GO:0006744: ubiquinone biosynthetic process, GO:0006744: ubiquinone biosynthetic process, GO:0006979: response to oxidative stress, GO:0006979: res…	00130: Ubiquinone and other terpenoid-quinone biosynthesis, 01100: Metabolic pathways
244091	123722	Fsd2	0.228911	0.584781	2.55462	fibronectin type III and SPRY domain containing 2	GO:0003674: molecular_function, GO:0005575: cellular_component, GO:0008150: biological_process
22596	7520	Xrcc5	0.315862	0.802244	2.53986	X-ray repair complementing defective repair in Chinese hamster cells 5	GO:0000166: nucleotide binding, GO:0000784: nuclear chromosome, telomeric region, GO:0003677: DNA binding, GO:0003690: double-stranded DNA binding, GO:0004003: ATP-dependent DNA helicase activity, GO:0004386: helicase activity, GO:0005524: ATP binding, GO:0005634: nucleus, GO:0005634: nucleus, GO:0005694: chromosome, GO:0005737: cytoplasm, GO:0005737: cytoplasm, GO:0005958: DNA-dependent protein …	03450: Non-homologous end-joining
171171	84628	Ntng2	0.161806	0.408932	2.52729	netrin G2	GO:0005886: plasma membrane, GO:0007275: multicellular organismal development, GO:0007399: nervous system development, GO:0007409: axonogenesis, GO:0016020: membrane, GO:0030154: cell differentiation, GO:0031225: anchored to membrane, GO:0046658: anchored to plasma membrane
231238	23231	Sel1l3	0.36156	0.910108	2.51717	sel-1 suppressor of lin-12-like 3 (C. elegans)	GO:0003674: molecular_function, GO:0005575: cellular_component, GO:0008150: biological_process, GO:0016020: membrane, GO:0016021: integral to membrane
66912	28969	Bzw2	0.44481	1.119	2.51568	basic leucine zipper and W2 domains 2	GO:0003674: molecular_function, GO:0005575: cellular_component, GO:0007275: multicellular organismal development, GO:0007399: nervous system development, GO:0008150: biological_process, GO:0016070: RNA metabolic process, GO:0030154: cell differentiation
100861669		LOC100861669	0.265323	0.666357	2.51149	uncharacterized LOC100861669
66733	93107	Kcng4	0.0943809	0.236556	2.5064	potassium voltage-gated channel, subfamily G, member 4	GO:0005216: ion channel activity, GO:0005244: voltage-gated ion channel activity, GO:0005249: voltage-gated potassium channel activity, GO:0005267: potassium channel activity, GO:0005886: plasma membrane, GO:0006810: transport, GO:0006811: ion transport, GO:0006813: potassium ion transport, GO:0008076: voltage-gated potassium channel complex, GO:0016020: membrane, GO:0016021: integral to membrane…
320707	492	Atp2b3	0.435119	1.08861	2.50187	ATPase, Ca++ transporting, plasma membrane 3	GO:0000166: nucleotide binding, GO:0005524: ATP binding, GO:0008152: metabolic process, GO:0016020: membrane, GO:0016021: integral to membrane, GO:0016787: hydrolase activity, GO:0030165: PDZ domain binding, GO:0045121: membrane raft	04020: Calcium signaling pathway, 04970: Salivary secretion, 04972: Pancreatic secretion
68585	57142	Rtn4	0.314635	0.78678	2.50062	reticulon 4	GO:0001525: angiogenesis, GO:0005515: protein binding, GO:0005635: nuclear envelope, GO:0005635: nuclear envelope, GO:0005737: cytoplasm, GO:0005783: endoplasmic reticulum, GO:0005783: endoplasmic reticulum, GO:0005886: plasma membrane, GO:0007399: nervous system development, GO:0007413: axonal fasciculation, GO:0007413: axonal fasciculation, GO:0010977: negative regulation of neuron projection d…
66979	56655	Pole4	0.339998	0.848133	2.49452	polymerase (DNA-directed), epsilon 4 (p12 subunit)	GO:0003674: molecular_function, GO:0003677: DNA binding, GO:0003887: DNA-directed DNA polymerase activity, GO:0005622: intracellular, GO:0005634: nucleus, GO:0005671: Ada2/Gcn5/Ada3 transcription activator complex, GO:0008152: metabolic process, GO:0016740: transferase activity, GO:0016779: nucleotidyltransferase activity, GO:0043565: sequence-specific DNA binding, GO:0043966: histone H3 acetylat…	00230: Purine metabolism, 00240: Pyrimidine metabolism, 01100: Metabolic pathways, 03030: DNA replication, 03410: Base excision repair, 03420: Nucleotide excision repair
18767	5569	Pkia	0.290386	0.723324	2.49091	protein kinase inhibitor, alpha	GO:0000122: negative regulation of transcription from RNA polymerase II promoter, GO:0004860: protein kinase inhibitor activity, GO:0004862: cAMP-dependent protein kinase inhibitor activity, GO:0005634: nucleus, GO:0005737: cytoplasm, GO:0006469: negative regulation of protein kinase activity, GO:0006469: negative regulation of protein kinase activity, GO:0010389: regulation of G2/M transition of…
237758	285676	Zfp454	0.239315	0.596047	2.49064	zinc finger protein 454	GO:0003674: molecular_function, GO:0005575: cellular_component, GO:0008150: biological_process, GO:0046872: metal ion binding
76453	11098	Prss23	0.269108	0.667767	2.4814	protease, serine, 23	GO:0003824: catalytic activity, GO:0004252: serine-type endopeptidase activity, GO:0005576: extracellular region, GO:0005634: nucleus, GO:0006508: proteolysis, GO:0008233: peptidase activity, GO:0008236: serine-type peptidase activity, GO:0016787: hydrolase activity
214321		Gm4787	0.376314	0.933618	2.48096	predicted gene 4787	GO:0003674: molecular_function, GO:0005575: cellular_component, GO:0008150: biological_process
68539	79073	Tmem109	0.309796	0.766547	2.47436	transmembrane protein 109	GO:0003674: molecular_function, GO:0005634: nucleus, GO:0005737: cytoplasm, GO:0005783: endoplasmic reticulum, GO:0008150: biological_process, GO:0016020: membrane, GO:0016021: integral to membrane, GO:0016529: sarcoplasmic reticulum, GO:0031965: nuclear membrane
17022	4060	Lum	0.241243	0.595849	2.46991	lumican	GO:0005518: collagen binding, GO:0005576: extracellular region, GO:0005578: proteinaceous extracellular matrix, GO:0005578: proteinaceous extracellular matrix, GO:0005583: fibrillar collagen, GO:0005615: extracellular space, GO:0045944: positive regulation of transcription from RNA polymerase II promoter
23831	23632	Car14	0.369521	0.910936	2.46518	carbonic anhydrase 14	GO:0004089: carbonate dehydratase activity, GO:0008152: metabolic process, GO:0016020: membrane, GO:0016021: integral to membrane, GO:0016829: lyase activity, GO:0046872: metal ion binding	00910: Nitrogen metabolism
52480		D7Ertd715e	0.270693	0.66528	2.45769	DNA segment, Chr 7, ERATO Doi 715, expressed
233335	23336	Synm	0.342204	0.839723	2.45387	synemin, intermediate filament protein	GO:0005198: structural molecule activity, GO:0005515: protein binding, GO:0005737: cytoplasm, GO:0005856: cytoskeleton, GO:0005882: intermediate filament, GO:0005912: adherens junction, GO:0008150: biological_process, GO:0008307: structural constituent of muscle, GO:0016020: membrane, GO:0017166: vinculin binding, GO:0019215: intermediate filament binding, GO:0030018: Z disc, GO:0030054: cell jun…
20787	6720	Srebf1	0.370969	0.90827	2.44837	sterol regulatory element binding transcription factor 1	GO:0000122: negative regulation of transcription from RNA polymerase II promoter, GO:0000122: negative regulation of transcription from RNA polymerase II promoter, GO:0003062: regulation of heart rate by chemical signal, GO:0003677: DNA binding, GO:0003682: chromatin binding, GO:0003700: sequence-specific DNA binding transcription factor activity, GO:0003700: sequence-specific DNA binding transcr…	04910: Insulin signaling pathway
11448	1145	Chrne	0.347947	0.850417	2.4441	cholinergic receptor, nicotinic, epsilon polypeptide	GO:0004889: acetylcholine-activated cation-selective channel activity, GO:0005216: ion channel activity, GO:0005230: extracellular ligand-gated ion channel activity, GO:0005886: plasma membrane, GO:0006810: transport, GO:0006811: ion transport, GO:0016020: membrane, GO:0016021: integral to membrane, GO:0030054: cell junction, GO:0034220: ion transmembrane transport, GO:0042391: regulation of memb…	04080: Neuroactive ligand-receptor interaction
50874	29765	Tmod4	0.322042	0.786921	2.44354	tropomodulin 4	GO:0003674: molecular_function, GO:0003779: actin binding, GO:0005523: tropomyosin binding, GO:0005575: cellular_component, GO:0005737: cytoplasm, GO:0005856: cytoskeleton, GO:0008150: biological_process
67149	79570	Nkain1	0.185406	0.452416	2.44014	Na+/K+ transporting ATPase interacting 1	GO:0005886: plasma membrane, GO:0016020: membrane, GO:0016021: integral to membrane
74492	390594	Kbtbd13	0.177321	0.432614	2.43972	kelch repeat and BTB (POZ) domain containing 13	GO:0003674: molecular_function, GO:0005575: cellular_component, GO:0005737: cytoplasm, GO:0008150: biological_process
225742	29906	St8sia5	0.297186	0.722979	2.43275	ST8 alpha-N-acetyl-neuraminide alpha-2,8-sialyltransferase 5	GO:0003828: alpha-N-acetylneuraminate alpha-2,8-sialyltransferase activity, GO:0005794: Golgi apparatus, GO:0006486: protein glycosylation, GO:0008373: sialyltransferase activity, GO:0016020: membrane, GO:0016021: integral to membrane, GO:0016740: transferase activity, GO:0016757: transferase activity, transferring glycosyl groups, GO:0030173: integral to Golgi membrane	00604: Glycosphingolipid biosynthesis - ganglio series, 01100: Metabolic pathways
24131	11155	Ldb3	0.296976	0.722321	2.43225	LIM domain binding 3	GO:0005080: protein kinase C binding, GO:0005515: protein binding, GO:0005737: cytoplasm, GO:0005856: cytoskeleton, GO:0008092: cytoskeletal protein binding, GO:0008270: zinc ion binding, GO:0030018: Z disc, GO:0042995: cell projection, GO:0046872: metal ion binding
24052	6444	Sgcd	0.328792	0.798291	2.42795	sarcoglycan, delta (dystrophin-associated glycoprotein)	GO:0005515: protein binding, GO:0005737: cytoplasm, GO:0005856: cytoskeleton, GO:0005886: plasma membrane, GO:0005887: integral to plasma membrane, GO:0007010: cytoskeleton organization, GO:0016010: dystrophin-associated glycoprotein complex, GO:0016012: sarcoglycan complex, GO:0016020: membrane, GO:0016021: integral to membrane, GO:0016044: cellular membrane organization	05410: Hypertrophic cardiomyopathy (HCM), 05412: Arrhythmogenic right ventricular cardiomyopathy (ARVC), 05414: Dilated cardiomyopathy, 05416: Viral myocarditis
73086	9252	Rps6ka5	0.359185	0.870695	2.42408	ribosomal protein S6 kinase, polypeptide 5	GO:0000166: nucleotide binding, GO:0000287: magnesium ion binding, GO:0004672: protein kinase activity, GO:0004674: protein serine/threonine kinase activity, GO:0004674: protein serine/threonine kinase activity, GO:0005524: ATP binding, GO:0005524: ATP binding, GO:0005634: nucleus, GO:0005634: nucleus, GO:0005737: cytoplasm, GO:0006355: regulation of transcription, DNA-dependent, GO:0006355: regu…	04010: MAPK signaling pathway, 04722: Neurotrophin signaling pathway, 05219: Bladder cancer
230779	347735	Serinc2	0.452221	1.09387	2.41888	serine incorporator 2	GO:0003674: molecular_function, GO:0005575: cellular_component, GO:0006658: phosphatidylserine metabolic process, GO:0016020: membrane, GO:0016021: integral to membrane, GO:0051347: positive regulation of transferase activity
242608	127435	Podn	0.45785	1.10521	2.41391	podocan	GO:0005518: collagen binding, GO:0005576: extracellular region, GO:0005578: proteinaceous extracellular matrix, GO:0005615: extracellular space, GO:0005737: cytoplasm, GO:0008285: negative regulation of cell proliferation, GO:0030336: negative regulation of cell migration
73341	9459	Arhgef6	0.361221	0.869366	2.40674	Rac/Cdc42 guanine nucleotide exchange factor (GEF) 6	GO:0005085: guanyl-nucleotide exchange factor activity, GO:0005089: Rho guanyl-nucleotide exchange factor activity, GO:0005543: phospholipid binding, GO:0005622: intracellular, GO:0005737: cytoplasm, GO:0035023: regulation of Rho protein signal transduction, GO:0035556: intracellular signal transduction, GO:0050790: regulation of catalytic activity	04810: Regulation of actin cytoskeleton, 05212: Pancreatic cancer
66993	6604	Smarcd3	0.263949	0.631885	2.39396	SWI/SNF related, matrix associated, actin dependent regulator of chromatin, subfamily d, member 3	GO:0000790: nuclear chromatin, GO:0002052: positive regulation of neuroblast proliferation, GO:0003007: heart morphogenesis, GO:0003139: secondary heart field specification, GO:0003219: cardiac right ventricle formation, GO:0005102: receptor binding, GO:0005515: protein binding, GO:0005634: nucleus, GO:0005634: nucleus, GO:0005737: cytoplasm, GO:0006337: nucleosome disassembly, GO:0006338: chroma…
59091	57158	Jph2	0.167333	0.399383	2.38675	junctophilin 2	GO:0005515: protein binding, GO:0005783: endoplasmic reticulum, GO:0005886: plasma membrane, GO:0007204: elevation of cytosolic calcium ion concentration, GO:0007275: multicellular organismal development, GO:0015278: calcium-release channel activity, GO:0015278: calcium-release channel activity, GO:0016020: membrane, GO:0016021: integral to membrane, GO:0016529: sarcoplasmic reticulum, GO:0016529…
104158	1066	Ces1d	0.17833	0.425321	2.38502	carboxylesterase 1D	GO:0004091: carboxylesterase activity, GO:0004091: carboxylesterase activity, GO:0004091: carboxylesterase activity, GO:0004771: sterol esterase activity, GO:0004806: triglyceride lipase activity, GO:0005737: cytoplasm, GO:0005783: endoplasmic reticulum, GO:0005788: endoplasmic reticulum lumen, GO:0005811: lipid particle, GO:0005829: cytosol, GO:0006629: lipid metabolic process, GO:0006637: acyl-…	00983: Drug metabolism - other enzymes, 01100: Metabolic pathways
12183	669	Bpgm	0.25119	0.599084	2.38498	2,3-bisphosphoglycerate mutase	GO:0003674: molecular_function, GO:0003824: catalytic activity, GO:0004082: bisphosphoglycerate mutase activity, GO:0004083: bisphosphoglycerate 2-phosphatase activity, GO:0004619: phosphoglycerate mutase activity, GO:0005575: cellular_component, GO:0006096: glycolysis, GO:0008152: metabolic process, GO:0016311: dephosphorylation, GO:0016787: hydrolase activity, GO:0016853: isomerase activity, GO…	00010: Glycolysis / Gluconeogenesis, 01100: Metabolic pathways
69253	3316	Hspb2	0.383926	0.914407	2.38173	heat shock protein 2	GO:0005634: nucleus, GO:0005737: cytoplasm, GO:0006950: response to stress, GO:0007525: somatic muscle development, GO:0009408: response to heat
72333	23022	Palld	0.306029	0.727447	2.37705	palladin, cytoskeletal associated protein	GO:0003779: actin binding, GO:0005634: nucleus, GO:0005634: nucleus, GO:0005737: cytoplasm, GO:0005856: cytoskeleton, GO:0005884: actin filament, GO:0005884: actin filament, GO:0030054: cell junction, GO:0042995: cell projection
170952	145270	Prima1	0.495035	1.17563	2.37485	proline rich membrane anchor 1	GO:0005515: protein binding, GO:0005886: plasma membrane, GO:0016020: membrane, GO:0016021: integral to membrane, GO:0019899: enzyme binding, GO:0030054: cell junction, GO:0031226: intrinsic to plasma membrane, GO:0042135: neurotransmitter catabolic process, GO:0043495: protein anchor, GO:0045202: synapse, GO:0051649: establishment of localization in cell
50795		Sh3bgr	0.13423	0.318755	2.37469	SH3-binding domain glutamic acid-rich protein	GO:0003674: molecular_function, GO:0005829: cytosol, GO:0008150: biological_process, GO:0017124: SH3 domain binding
17067		Ly6c1	0.385607	0.914498	2.37158	lymphocyte antigen 6 complex, locus C1	GO:0005886: plasma membrane, GO:0009897: external side of plasma membrane, GO:0016020: membrane, GO:0031225: anchored to membrane
11484	443	Aspa	0.437099	1.03491	2.36768	aspartoacylase	GO:0004046: aminoacylase activity, GO:0005634: nucleus, GO:0005737: cytoplasm, GO:0006083: acetate metabolic process, GO:0008152: metabolic process, GO:0016787: hydrolase activity, GO:0016788: hydrolase activity, acting on ester bonds, GO:0016811: hydrolase activity, acting on carbon-nitrogen (but not peptide) bonds, in linear amides, GO:0019807: aspartoacylase activity, GO:0046872: metal ion bin…	00250: Alanine, aspartate and glutamate metabolism, 00340: Histidine metabolism
18295	4969	Ogn	0.173266	0.409275	2.36212	osteoglycin	GO:0005576: extracellular region, GO:0005578: proteinaceous extracellular matrix, GO:0005615: extracellular space, GO:0008083: growth factor activity, GO:0048662: negative regulation of smooth muscle cell proliferation
66881	51449	Pcyox1	0.315467	0.743207	2.3559	prenylcysteine oxidase 1	GO:0001735: prenylcysteine oxidase activity, GO:0001735: prenylcysteine oxidase activity, GO:0005764: lysosome, GO:0005886: plasma membrane, GO:0006200: ATP catabolic process, GO:0006821: chloride transport, GO:0008555: chloride-transporting ATPase activity, GO:0016491: oxidoreductase activity, GO:0016670: oxidoreductase activity, acting on a sulfur group of donors, oxygen as acceptor, GO:0030327…
68810	91624	Nexn	0.24486	0.57636	2.35383	nexilin	GO:0003779: actin binding, GO:0005737: cytoplasm, GO:0005856: cytoskeleton, GO:0005924: cell-substrate adherens junction, GO:0008307: structural constituent of muscle, GO:0030018: Z disc, GO:0030054: cell junction, GO:0030334: regulation of cell migration, GO:0051015: actin filament binding
227721	84814	Ppapdc3	0.215132	0.506298	2.35343	phosphatidic acid phosphatase type 2 domain containing 3	GO:0003824: catalytic activity, GO:0005634: nucleus, GO:0005635: nuclear envelope, GO:0005783: endoplasmic reticulum, GO:0008152: metabolic process, GO:0010832: negative regulation of myotube differentiation, GO:0010832: negative regulation of myotube differentiation, GO:0016020: membrane, GO:0016021: integral to membrane, GO:0016787: hydrolase activity
66531	56942	2310061C15Rik	0.278449	0.655239	2.35317	RIKEN cDNA 2310061C15 gene	GO:0003674: molecular_function, GO:0005739: mitochondrion, GO:0008150: biological_process
99031	114880	Osbpl6	0.184017	0.432735	2.35161	oxysterol binding protein-like 6	GO:0003674: molecular_function, GO:0005543: phospholipid binding, GO:0005575: cellular_component, GO:0006810: transport, GO:0006869: lipid transport, GO:0008150: biological_process, GO:0008289: lipid binding
100126434		Trgj4	0.224179	0.526646	2.34922	T cell receptor gamma joining 4
230718	84618	Nt5c1a	0.137769	0.323027	2.34469	5'-nucleotidase, cytosolic IA	GO:0000166: nucleotide binding, GO:0000287: magnesium ion binding, GO:0005575: cellular_component, GO:0005737: cytoplasm, GO:0008253: 5'-nucleotidase activity, GO:0009117: nucleotide metabolic process, GO:0009128: purine nucleoside monophosphate catabolic process, GO:0016311: dephosphorylation, GO:0016787: hydrolase activity, GO:0046085: adenosine metabolic process	00230: Purine metabolism, 00240: Pyrimidine metabolism, 00760: Nicotinate and nicotinamide metabolism, 01100: Metabolic pathways
18194	50814	Nsdhl	0.454258	1.06323	2.34059	NAD(P) dependent steroid dehydrogenase-like	GO:0000166: nucleotide binding, GO:0001942: hair follicle development, GO:0003854: 3-beta-hydroxy-delta5-steroid dehydrogenase activity, GO:0005783: endoplasmic reticulum, GO:0005811: lipid particle, GO:0006694: steroid biosynthetic process, GO:0006695: cholesterol biosynthetic process, GO:0007224: smoothened signaling pathway, GO:0008203: cholesterol metabolic process, GO:0008610: lipid biosynth…	00100: Steroid biosynthesis, 01100: Metabolic pathways
67283	60386	Slc25a19	0.284442	0.663301	2.33193	solute carrier family 25 (mitochondrial thiamine pyrophosphate carrier), member 19	GO:0005739: mitochondrion, GO:0005743: mitochondrial inner membrane, GO:0006810: transport, GO:0016020: membrane, GO:0016021: integral to membrane, GO:0055085: transmembrane transport
66273	28971	1810020D17Rik	0.232013	0.538233	2.31984	RIKEN cDNA 1810020D17 gene	GO:0003674: molecular_function, GO:0005575: cellular_component, GO:0005737: cytoplasm, GO:0043066: negative regulation of apoptotic process, GO:0045600: positive regulation of fat cell differentiation, GO:0045600: positive regulation of fat cell differentiation
21401	6920	Tcea3	0.387147	0.887657	2.29282	transcription elongation factor A (SII), 3	GO:0003676: nucleic acid binding, GO:0003677: DNA binding, GO:0003746: translation elongation factor activity, GO:0005634: nucleus, GO:0006351: transcription, DNA-dependent, GO:0006355: regulation of transcription, DNA-dependent, GO:0006357: regulation of transcription from RNA polymerase II promoter, GO:0006414: translational elongation, GO:0008270: zinc ion binding, GO:0032784: regulation of DN…
66106	23676	Smpx	0.376138	0.861737	2.29102	small muscle protein, X-linked	GO:0005634: nucleus, GO:0005737: cytoplasm, GO:0005927: muscle tendon junction, GO:0031430: M band, GO:0043034: costamere, GO:0043292: contractile fiber
14264	2331	Fmod	0.115174	0.263781	2.29028	fibromodulin	GO:0005576: extracellular region, GO:0005578: proteinaceous extracellular matrix, GO:0005615: extracellular space, GO:0005622: intracellular, GO:0031012: extracellular matrix
353208	100529215	Zfp931	0.370365	0.846248	2.2849	zinc finger protein 931	GO:0003674: molecular_function, GO:0005575: cellular_component, GO:0008150: biological_process, GO:0046872: metal ion binding
20183	6258	Rxrg	0.168956	0.385048	2.27898	retinoid X receptor gamma	GO:0003677: DNA binding, GO:0003700: sequence-specific DNA binding transcription factor activity, GO:0003707: steroid hormone receptor activity, GO:0004886: 9-cis retinoic acid receptor activity, GO:0005634: nucleus, GO:0006351: transcription, DNA-dependent, GO:0006355: regulation of transcription, DNA-dependent, GO:0006357: regulation of transcription from RNA polymerase II promoter, GO:0008270:…	03320: PPAR signaling pathway, 04920: Adipocytokine signaling pathway, 05200: Pathways in cancer, 05216: Thyroid cancer, 05222: Small cell lung cancer, 05223: Non-small cell lung cancer
216033	29119	Ctnna3	0.480551	1.09398	2.27651	catenin (cadherin associated protein), alpha 3	GO:0005198: structural molecule activity, GO:0005515: protein binding, GO:0005737: cytoplasm, GO:0005856: cytoskeleton, GO:0005916: fascia adherens, GO:0005916: fascia adherens, GO:0007155: cell adhesion, GO:0015629: actin cytoskeleton, GO:0016337: cell-cell adhesion, GO:0016337: cell-cell adhesion, GO:0030027: lamellipodium, GO:0045296: cadherin binding	04520: Adherens junction, 04530: Tight junction, 04670: Leukocyte transendothelial migration, 05100: Bacterial invasion of epithelial cells, 05200: Pathways in cancer, 05213: Endometrial cancer, 05412: Arrhythmogenic right ventricular cardiomyopathy (ARVC)
20660	6653	Sorl1	0.327539	0.744857	2.2741	sortilin-related receptor, LDLR class A repeats-containing	GO:0005515: protein binding, GO:0006629: lipid metabolic process, GO:0006810: transport, GO:0006869: lipid transport, GO:0006897: endocytosis, GO:0007275: multicellular organismal development, GO:0008202: steroid metabolic process, GO:0008203: cholesterol metabolic process, GO:0016020: membrane, GO:0016021: integral to membrane, GO:0030169: low-density lipoprotein particle binding, GO:0034362: lo…
12315		Calm3	0.192331	0.437329	2.27383	calmodulin 3	GO:0005509: calcium ion binding, GO:0005575: cellular_component, GO:0007049: cell cycle	04020: Calcium signaling pathway, 04070: Phosphatidylinositol signaling system, 04114: Oocyte meiosis, 04270: Vascular smooth muscle contraction, 04720: Long-term potentiation, 04722: Neurotrophin signaling pathway, 04740: Olfactory transduction, 04744: Phototransduction, 04910: Insulin signaling pathway, 04912: GnRH signaling pathway, 04916: Melanogenesis, 04970: Salivary secretion, 04971: Gastr…
16168	3600	Il15	0.196652	0.442959	2.2525	interleukin 15	GO:0001779: natural killer cell differentiation, GO:0001866: NK T cell proliferation, GO:0005125: cytokine activity, GO:0005125: cytokine activity, GO:0005126: cytokine receptor binding, GO:0005576: extracellular region, GO:0005615: extracellular space, GO:0005737: cytoplasm, GO:0006955: immune response, GO:0008284: positive regulation of cell proliferation, GO:0030212: hyaluronan metabolic proce…	04060: Cytokine-cytokine receptor interaction, 04630: Jak-STAT signaling pathway, 04672: Intestinal immune network for IgA production, 05323: Rheumatoid arthritis
67608	26502	Narf	0.288246	0.648829	2.25095	nuclear prelamin A recognition factor	GO:0005521: lamin binding, GO:0005634: nucleus, GO:0005638: lamin filament, GO:0008150: biological_process, GO:0031981: nuclear lumen
18802	84812	Plcd4	0.0868503	0.195455	2.25048	phospholipase C, delta 4	GO:0004435: phosphatidylinositol phospholipase C activity, GO:0004629: phospholipase C activity, GO:0004871: signal transducer activity, GO:0005509: calcium ion binding, GO:0005543: phospholipid binding, GO:0005622: intracellular, GO:0005623: cell, GO:0005634: nucleus, GO:0005737: cytoplasm, GO:0005783: endoplasmic reticulum, GO:0006629: lipid metabolic process, GO:0007165: signal transduction, G…	00562: Inositol phosphate metabolism, 01100: Metabolic pathways, 04020: Calcium signaling pathway, 04070: Phosphatidylinositol signaling system
75894	161823	Adal	0.341377	0.767651	2.24869	adenosine deaminase-like	GO:0004000: adenosine deaminase activity, GO:0005575: cellular_component, GO:0006154: adenosine catabolic process, GO:0009117: nucleotide metabolic process, GO:0009168: purine ribonucleoside monophosphate biosynthetic process, GO:0016787: hydrolase activity, GO:0019239: deaminase activity, GO:0046103: inosine biosynthetic process, GO:0046872: metal ion binding
232855	374928	Zfp772	0.363356	0.816898	2.2482	zinc finger protein 772	GO:0003674: molecular_function, GO:0005575: cellular_component, GO:0008150: biological_process, GO:0046872: metal ion binding
67821	23439	Atp1b4	0.318175	0.714896	2.24687	ATPase, (Na+)/K+ transporting, beta 4 polypeptide	GO:0000785: chromatin, GO:0005391: sodium:potassium-exchanging ATPase activity, GO:0005515: protein binding, GO:0005634: nucleus, GO:0005635: nuclear envelope, GO:0005637: nuclear inner membrane, GO:0006200: ATP catabolic process, GO:0006351: transcription, DNA-dependent, GO:0006355: regulation of transcription, DNA-dependent, GO:0006810: transport, GO:0006811: ion transport, GO:0006813: potassiu…	04260: Cardiac muscle contraction, 04960: Aldosterone-regulated sodium reabsorption, 04964: Proximal tubule bicarbonate reclamation, 04970: Salivary secretion, 04971: Gastric acid secretion, 04972: Pancreatic secretion, 04973: Carbohydrate digestion and absorption, 04974: Protein digestion and absorption, 04976: Bile secretion
18747	5566	Prkaca	0.479426	1.07365	2.23945	protein kinase, cAMP dependent, catalytic, alpha	GO:0000166: nucleotide binding, GO:0001707: mesoderm formation, GO:0004672: protein kinase activity, GO:0004674: protein serine/threonine kinase activity, GO:0004691: cAMP-dependent protein kinase activity, GO:0004691: cAMP-dependent protein kinase activity, GO:0005515: protein binding, GO:0005524: ATP binding, GO:0005634: nucleus, GO:0005634: nucleus, GO:0005737: cytoplasm, GO:0005737: cytoplasm…	04010: MAPK signaling pathway, 04020: Calcium signaling pathway, 04062: Chemokine signaling pathway, 04114: Oocyte meiosis, 04210: Apoptosis, 04270: Vascular smooth muscle contraction, 04310: Wnt signaling pathway, 04340: Hedgehog signaling pathway, 04540: Gap junction, 04720: Long-term potentiation, 04740: Olfactory transduction, 04742: Taste transduction, 04910: Insulin signaling pathway, 04912…
66970	23635	Ssbp2	0.440075	0.974627	2.21468	single-stranded DNA binding protein 2	GO:0003677: DNA binding, GO:0003697: single-stranded DNA binding, GO:0005515: protein binding, GO:0005634: nucleus, GO:0005737: cytoplasm, GO:0006351: transcription, DNA-dependent, GO:0006355: regulation of transcription, DNA-dependent, GO:0008150: biological_process
21384	6913	Tbx15	0.34759	0.768958	2.21225	T-box 15	GO:0000122: negative regulation of transcription from RNA polymerase II promoter, GO:0000976: transcription regulatory region sequence-specific DNA binding, GO:0001106: RNA polymerase II transcription corepressor activity, GO:0003677: DNA binding, GO:0003700: sequence-specific DNA binding transcription factor activity, GO:0005634: nucleus, GO:0006351: transcription, DNA-dependent, GO:0006355: reg…
69487	79133	Ndufaf5	0.283707	0.625243	2.20383	NADH dehydrogenase (ubiquinone) complex I, assembly factor 5	GO:0003674: molecular_function, GO:0005739: mitochondrion, GO:0005743: mitochondrial inner membrane, GO:0008152: metabolic process, GO:0008168: methyltransferase activity, GO:0016020: membrane, GO:0016740: transferase activity, GO:0031314: extrinsic to mitochondrial inner membrane, GO:0032259: methylation, GO:0032981: mitochondrial respiratory chain complex I assembly
11636	203	Ak1	0.324345	0.714792	2.2038	adenylate kinase 1	GO:0000166: nucleotide binding, GO:0004017: adenylate kinase activity, GO:0004017: adenylate kinase activity, GO:0005524: ATP binding, GO:0005737: cytoplasm, GO:0005737: cytoplasm, GO:0005886: plasma membrane, GO:0006139: nucleobase-containing compound metabolic process, GO:0006172: ADP biosynthetic process, GO:0007050: cell cycle arrest, GO:0010828: positive regulation of glucose transport, GO:0…	00230: Purine metabolism, 01100: Metabolic pathways
72017	51706	Cyb5r1	0.353437	0.778885	2.20374	cytochrome b5 reductase 1	GO:0004128: cytochrome-b5 reductase activity, GO:0005739: mitochondrion, GO:0006694: steroid biosynthetic process, GO:0008610: lipid biosynthetic process, GO:0016020: membrane, GO:0016021: integral to membrane, GO:0016126: sterol biosynthetic process, GO:0016491: oxidoreductase activity, GO:0055114: oxidation-reduction process	00520: Amino sugar and nucleotide sugar metabolism
242570	55225	Raver2	0.380953	0.835071	2.19206	ribonucleoprotein, PTB-binding 2	GO:0000166: nucleotide binding, GO:0003676: nucleic acid binding, GO:0003723: RNA binding, GO:0005515: protein binding, GO:0005634: nucleus, GO:0005737: cytoplasm, GO:0030529: ribonucleoprotein complex
53413	23265	Exoc7	0.421273	0.922413	2.18959	exocyst complex component 7	GO:0000145: exocyst, GO:0005515: protein binding, GO:0005737: cytoplasm, GO:0005815: microtubule organizing center, GO:0005886: plasma membrane, GO:0006810: transport, GO:0006887: exocytosis, GO:0008150: biological_process, GO:0015031: protein transport, GO:0016020: membrane, GO:0032584: growth cone membrane, GO:0034451: centriolar satellite	04910: Insulin signaling pathway
77652		Zfp955a	0.312992	0.683956	2.18522	zinc finger protein 955A	GO:0003674: molecular_function, GO:0005575: cellular_component, GO:0008150: biological_process, GO:0046872: metal ion binding
73600		1700120C14Rik	0.300672	0.65604	2.18191	RIKEN cDNA 1700120C14 gene
78286	89797	Nav2	0.37942	0.826443	2.17817	neuron navigator 2	GO:0000166: nucleotide binding, GO:0003025: regulation of systemic arterial blood pressure by baroreceptor feedback, GO:0005524: ATP binding, GO:0005614: interstitial matrix, GO:0007399: nervous system development, GO:0007605: sensory perception of sound, GO:0007608: sensory perception of smell, GO:0007626: locomotory behavior, GO:0008201: heparin binding, GO:0021554: optic nerve development, GO:…
72157	5236	Pgm2	0.207691	0.451658	2.17467	phosphoglucomutase 2	GO:0000287: magnesium ion binding, GO:0004614: phosphoglucomutase activity, GO:0004614: phosphoglucomutase activity, GO:0005737: cytoplasm, GO:0005829: cytosol, GO:0005975: carbohydrate metabolic process, GO:0005978: glycogen biosynthetic process, GO:0006006: glucose metabolic process, GO:0008152: metabolic process, GO:0015629: actin cytoskeleton, GO:0016853: isomerase activity, GO:0016868: intra…	00010: Glycolysis / Gluconeogenesis, 00030: Pentose phosphate pathway, 00052: Galactose metabolism, 00230: Purine metabolism, 00500: Starch and sucrose metabolism, 00520: Amino sugar and nucleotide sugar metabolism, 01100: Metabolic pathways
21778	374618	Tex9	0.444049	0.96392	2.17075	testis expressed gene 9	GO:0003674: molecular_function, GO:0003677: DNA binding, GO:0005575: cellular_component, GO:0005634: nucleus, GO:0008150: biological_process
66307	51015	Isoc1	0.341321	0.740131	2.16843	isochorismatase domain containing 1	GO:0003674: molecular_function, GO:0003824: catalytic activity, GO:0005777: peroxisome, GO:0005777: peroxisome, GO:0008150: biological_process, GO:0008152: metabolic process
213027		Evi5l	0.495519	1.07125	2.16187	ecotropic viral integration site 5 like	GO:0005097: Rab GTPase activator activity, GO:0005575: cellular_component, GO:0032851: positive regulation of Rab GTPase activity
217198	79990	Plekhh3	0.363618	0.785896	2.16133	pleckstrin homology domain containing, family H (with MyTH4 domain) member 3	GO:0003674: molecular_function, GO:0005543: phospholipid binding, GO:0005856: cytoskeleton, GO:0007165: signal transduction, GO:0008150: biological_process
12335	825	Capn3	0.478943	1.03306	2.15696	calpain 3	GO:0001896: autolysis, GO:0003824: catalytic activity, GO:0004198: calcium-dependent cysteine-type endopeptidase activity, GO:0004198: calcium-dependent cysteine-type endopeptidase activity, GO:0005102: receptor binding, GO:0005509: calcium ion binding, GO:0005515: protein binding, GO:0005622: intracellular, GO:0005634: nucleus, GO:0005737: cytoplasm, GO:0005737: cytoplasm, GO:0005829: cytosol, G…
108909	64853	Aida	0.438245	0.944796	2.15586	axin interactor, dorsalization associated	GO:0005515: protein binding, GO:0007275: multicellular organismal development, GO:0009953: dorsal/ventral pattern formation, GO:0019904: protein domain specific binding, GO:0043496: regulation of protein homodimerization activity, GO:0043508: negative regulation of JUN kinase activity, GO:0043508: negative regulation of JUN kinase activity, GO:0043508: negative regulation of JUN kinase activity, …
208922	22849	Cpeb3	0.359233	0.773588	2.15344	cytoplasmic polyadenylation element binding protein 3	GO:0000166: nucleotide binding, GO:0003676: nucleic acid binding, GO:0003723: RNA binding, GO:0005515: protein binding, GO:0017148: negative regulation of translation, GO:0045202: synapse
276829	342527	Smtnl2	0.203528	0.434347	2.13409	smoothelin-like 2	GO:0003674: molecular_function, GO:0005575: cellular_component, GO:0008150: biological_process
240726	81796	Slco5a1	0.314343	0.667171	2.12243	solute carrier organic anion transporter family, member 5A1	GO:0003674: molecular_function, GO:0005575: cellular_component, GO:0008150: biological_process
29863	27115	Pde7b	0.249753	0.529839	2.12145	phosphodiesterase 7B	GO:0003824: catalytic activity, GO:0004114: 3',5'-cyclic-nucleotide phosphodiesterase activity, GO:0004115: 3',5'-cyclic-AMP phosphodiesterase activity, GO:0004115: 3',5'-cyclic-AMP phosphodiesterase activity, GO:0007165: signal transduction, GO:0008081: phosphoric diester hydrolase activity, GO:0008152: metabolic process, GO:0008152: metabolic process, GO:0016787: hydrolase activity, GO:0046872:…	00230: Purine metabolism
20238	6310	Atxn1	0.400638	0.849305	2.11988	ataxin 1	GO:0003677: DNA binding, GO:0003723: RNA binding, GO:0005515: protein binding, GO:0005634: nucleus, GO:0005654: nucleoplasm, GO:0005737: cytoplasm, GO:0006351: transcription, DNA-dependent, GO:0006355: regulation of transcription, DNA-dependent, GO:0008022: protein C-terminus binding, GO:0008266: poly(U) RNA binding, GO:0008344: adult locomotory behavior, GO:0008542: visual learning, GO:0016363: …
67681	29074	Mrpl18	0.326424	0.691896	2.11962	mitochondrial ribosomal protein L18	GO:0003723: RNA binding, GO:0005739: mitochondrion, GO:0005739: mitochondrion, GO:0005840: ribosome, GO:0006810: transport, GO:0008097: 5S rRNA binding, GO:0030529: ribonucleoprotein complex, GO:0035928: rRNA import into mitochondrion
170786	10332	Cd209a	0.413977	0.873937	2.11108	CD209a antigen	GO:0005537: mannose binding, GO:0006897: endocytosis, GO:0009986: cell surface, GO:0016020: membrane, GO:0016021: integral to membrane, GO:0030246: carbohydrate binding, GO:0042129: regulation of T cell proliferation, GO:0046872: metal ion binding	04145: Phagosome
108083	8396	Pip4k2b	0.439425	0.927408	2.1105	phosphatidylinositol-5-phosphate 4-kinase, type II, beta	GO:0000166: nucleotide binding, GO:0005515: protein binding, GO:0005524: ATP binding, GO:0005634: nucleus, GO:0005737: cytoplasm, GO:0005783: endoplasmic reticulum, GO:0005886: plasma membrane, GO:0016020: membrane, GO:0016301: kinase activity, GO:0016307: phosphatidylinositol phosphate kinase activity, GO:0016308: 1-phosphatidylinositol-4-phosphate 5-kinase activity, GO:0016309: 1-phosphatidylin…	00562: Inositol phosphate metabolism, 04070: Phosphatidylinositol signaling system, 04810: Regulation of actin cytoskeleton
236915	23229	Arhgef9	0.291177	0.613551	2.10714	CDC42 guanine nucleotide exchange factor (GEF) 9	GO:0005085: guanyl-nucleotide exchange factor activity, GO:0005089: Rho guanyl-nucleotide exchange factor activity, GO:0005543: phospholipid binding, GO:0005622: intracellular, GO:0005737: cytoplasm, GO:0005938: cell cortex, GO:0005938: cell cortex, GO:0007264: small GTPase mediated signal transduction, GO:0035023: regulation of Rho protein signal transduction, GO:0043113: receptor clustering, GO…
209760	79905	Tmc7	0.322324	0.678063	2.10367	transmembrane channel-like gene family 7	GO:0003674: molecular_function, GO:0005575: cellular_component, GO:0008150: biological_process, GO:0016020: membrane, GO:0016021: integral to membrane
11733	286	Ank1	0.339272	0.713599	2.10332	ankyrin 1, erythroid	GO:0005634: nucleus, GO:0005737: cytoplasm, GO:0005856: cytoskeleton, GO:0005886: plasma membrane, GO:0006779: porphyrin-containing compound biosynthetic process, GO:0006888: ER to Golgi vesicle-mediated transport, GO:0007165: signal transduction, GO:0008093: cytoskeletal adaptor activity, GO:0010638: positive regulation of organelle organization, GO:0014731: spectrin-associated cytoskeleton, GO:…
13136	1604	Cd55	0.435878	0.914135	2.09723	CD55 antigen	GO:0004857: enzyme inhibitor activity, GO:0005886: plasma membrane, GO:0006958: complement activation, classical pathway, GO:0007204: elevation of cytosolic calcium ion concentration, GO:0009897: external side of plasma membrane, GO:0009986: cell surface, GO:0016020: membrane, GO:0016324: apical plasma membrane, GO:0031225: anchored to membrane, GO:0043086: negative regulation of catalytic activi…	04610: Complement and coagulation cascades, 04640: Hematopoietic cell lineage, 05416: Viral myocarditis
74238	80298	Mterfd3	0.270437	0.564384	2.08693	MTERF domain containing 3	GO:0005739: mitochondrion, GO:0005759: mitochondrial matrix, GO:0006351: transcription, DNA-dependent, GO:0006355: regulation of transcription, DNA-dependent, GO:0042645: mitochondrial nucleoid, GO:0042803: protein homodimerization activity, GO:0044212: transcription regulatory region DNA binding
18542	5118	Pcolce	0.316052	0.659511	2.08672	procollagen C-endopeptidase enhancer protein	GO:0005518: collagen binding, GO:0005576: extracellular region, GO:0005581: collagen, GO:0005615: extracellular space, GO:0006508: proteolysis, GO:0008201: heparin binding, GO:0010952: positive regulation of peptidase activity, GO:0016504: peptidase activator activity
76220		6530402F18Rik	0.365685	0.762794	2.08593	RIKEN cDNA 6530402F18 gene
100502648		Gm19304	0.368638	0.766811	2.08012	predicted gene, 19304
20597	6609	Smpd1	0.456186	0.947252	2.07646	sphingomyelin phosphodiesterase 1, acid lysosomal	GO:0004767: sphingomyelin phosphodiesterase activity, GO:0005615: extracellular space, GO:0005764: lysosome, GO:0006685: sphingomyelin catabolic process, GO:0008152: metabolic process, GO:0016787: hydrolase activity, GO:0016798: hydrolase activity, acting on glycosyl bonds, GO:0023021: termination of signal transduction, GO:0035307: positive regulation of protein dephosphorylation, GO:0042220: re…	00600: Sphingolipid metabolism, 01100: Metabolic pathways, 04142: Lysosome
74729		Setmar	0.481905	1	2.0751	SET domain and mariner transposase fusion gene	GO:0005634: nucleus, GO:0005694: chromosome, GO:0008168: methyltransferase activity, GO:0008270: zinc ion binding, GO:0016568: chromatin modification, GO:0016740: transferase activity, GO:0018022: peptidyl-lysine methylation, GO:0018024: histone-lysine N-methyltransferase activity, GO:0032259: methylation, GO:0034968: histone lysine methylation	00310: Lysine degradation
66390	51012	Slmo2	0.448647	0.929849	2.07256	slowmo homolog 2 (Drosophila)	GO:0003674: molecular_function, GO:0005739: mitochondrion, GO:0008150: biological_process
56190	55544	Rbm38	0.427326	0.884726	2.07038	RNA binding motif protein 38	GO:0000166: nucleotide binding, GO:0003676: nucleic acid binding, GO:0003723: RNA binding, GO:0003729: mRNA binding, GO:0003729: mRNA binding, GO:0003730: mRNA 3'-UTR binding, GO:0005634: nucleus, GO:0005737: cytoplasm, GO:0005829: cytosol, GO:0006397: mRNA processing, GO:0006977: DNA damage response, signal transduction by p53 class mediator resulting in cell cycle arrest, GO:0006978: DNA damage…
77994		2810055G20Rik	0.369222	0.763094	2.06676	RIKEN cDNA 2810055G20 gene	GO:0003674: molecular_function, GO:0005575: cellular_component, GO:0008150: biological_process
723966		Mirlet7c-2	0.370372	0.763248	2.06076	microRNA let7c-2	GO:0007566: embryo implantation, GO:0035195: gene silencing by miRNA
12793	10175	Cnih	0.396669	0.816743	2.059	cornichon homolog (Drosophila)	GO:0003674: molecular_function, GO:0005575: cellular_component, GO:0008150: biological_process
75747	143686	Sesn3	0.355587	0.730764	2.05509	sestrin 3	GO:0003674: molecular_function, GO:0005575: cellular_component, GO:0005634: nucleus, GO:0007050: cell cycle arrest, GO:0008150: biological_process	04115: p53 signaling pathway
22775	284307	Zik1	0.474247	0.974345	2.05451	zinc finger protein interacting with K protein 1	GO:0003676: nucleic acid binding, GO:0003677: DNA binding, GO:0005622: intracellular, GO:0005634: nucleus, GO:0006351: transcription, DNA-dependent, GO:0006355: regulation of transcription, DNA-dependent, GO:0008270: zinc ion binding, GO:0046872: metal ion binding
70503	8528	Ddo	0.489681	1.00553	2.05344	D-aspartate oxidase	GO:0000166: nucleotide binding, GO:0003884: D-amino-acid oxidase activity, GO:0005102: receptor binding, GO:0005777: peroxisome, GO:0006531: aspartate metabolic process, GO:0006533: aspartate catabolic process, GO:0007320: insemination, GO:0007625: grooming behavior, GO:0008445: D-aspartate oxidase activity, GO:0016491: oxidoreductase activity, GO:0016641: oxidoreductase activity, acting on the C…	00250: Alanine, aspartate and glutamate metabolism, 04146: Peroxisome
20866	6786	Stim1	0.443199	0.909854	2.05292	stromal interaction molecule 1	GO:0005509: calcium ion binding, GO:0005513: detection of calcium ion, GO:0005515: protein binding, GO:0005737: cytoplasm, GO:0005783: endoplasmic reticulum, GO:0005856: cytoskeleton, GO:0005874: microtubule, GO:0005886: plasma membrane, GO:0005887: integral to plasma membrane, GO:0006810: transport, GO:0006811: ion transport, GO:0006812: cation transport, GO:0006816: calcium ion transport, GO:00…
16401	3676	Itga4	0.150109	0.308134	2.05273	integrin alpha 4	GO:0001968: fibronectin binding, GO:0001974: blood vessel remodeling, GO:0007155: cell adhesion, GO:0007157: heterophilic cell-cell adhesion, GO:0007159: leukocyte cell-cell adhesion, GO:0007159: leukocyte cell-cell adhesion, GO:0007160: cell-matrix adhesion, GO:0007229: integrin-mediated signaling pathway, GO:0007507: heart development, GO:0008305: integrin complex, GO:0009897: external side of …	04510: Focal adhesion, 04512: ECM-receptor interaction, 04514: Cell adhesion molecules (CAMs), 04640: Hematopoietic cell lineage, 04670: Leukocyte transendothelial migration, 04672: Intestinal immune network for IgA production, 04810: Regulation of actin cytoskeleton, 05140: Leishmaniasis, 05410: Hypertrophic cardiomyopathy (HCM), 05412: Arrhythmogenic right ventricular cardiomyopathy (ARVC), 054…
56012	5224	Pgam2	0.296729	0.60559	2.04089	phosphoglycerate mutase 2	GO:0003824: catalytic activity, GO:0004082: bisphosphoglycerate mutase activity, GO:0004083: bisphosphoglycerate 2-phosphatase activity, GO:0004619: phosphoglycerate mutase activity, GO:0004619: phosphoglycerate mutase activity, GO:0005634: nucleus, GO:0005829: cytosol, GO:0006094: gluconeogenesis, GO:0006096: glycolysis, GO:0006941: striated muscle contraction, GO:0008152: metabolic process, GO:…	00010: Glycolysis / Gluconeogenesis, 01100: Metabolic pathways
71085	84986	Arhgap19	0.452951	0.918171	2.02709	Rho GTPase activating protein 19	GO:0003674: molecular_function, GO:0005096: GTPase activator activity, GO:0005622: intracellular, GO:0007165: signal transduction, GO:0043547: positive regulation of GTPase activity
18577	5141	Pde4a	0.156574	0.316878	2.02383	phosphodiesterase 4A, cAMP specific	GO:0003824: catalytic activity, GO:0004114: 3',5'-cyclic-nucleotide phosphodiesterase activity, GO:0004115: 3',5'-cyclic-AMP phosphodiesterase activity, GO:0004115: 3',5'-cyclic-AMP phosphodiesterase activity, GO:0005634: nucleus, GO:0005737: cytoplasm, GO:0005737: cytoplasm, GO:0006198: cAMP catabolic process, GO:0007165: signal transduction, GO:0007608: sensory perception of smell, GO:0008081: …	00230: Purine metabolism
214779	345462	Zfp879	0.424541	0.858521	2.02223	zinc finger protein 879	GO:0003676: nucleic acid binding, GO:0003677: DNA binding, GO:0005622: intracellular, GO:0005634: nucleus, GO:0006351: transcription, DNA-dependent, GO:0006355: regulation of transcription, DNA-dependent, GO:0008150: biological_process, GO:0008270: zinc ion binding, GO:0046872: metal ion binding
14168	2258	Fgf13	0.464421	0.934455	2.01209	fibroblast growth factor 13	GO:0000165: MAPK cascade, GO:0005634: nucleus, GO:0005737: cytoplasm, GO:0017080: sodium channel regulator activity, GO:0030295: protein kinase activator activity, GO:0045860: positive regulation of protein kinase activity	04010: MAPK signaling pathway, 04810: Regulation of actin cytoskeleton, 05200: Pathways in cancer, 05218: Melanoma
11931	481	Atp1b1	0.295268	0.593702	2.01073	ATPase, Na+/K+ transporting, beta 1 polypeptide	GO:0001666: response to hypoxia, GO:0001824: blastocyst development, GO:0005391: sodium:potassium-exchanging ATPase activity, GO:0005515: protein binding, GO:0005886: plasma membrane, GO:0005890: sodium:potassium-exchanging ATPase complex, GO:0005901: caveola, GO:0006200: ATP catabolic process, GO:0006754: ATP biosynthetic process, GO:0006810: transport, GO:0006811: ion transport, GO:0006813: pot…	04260: Cardiac muscle contraction, 04960: Aldosterone-regulated sodium reabsorption, 04964: Proximal tubule bicarbonate reclamation, 04970: Salivary secretion, 04971: Gastric acid secretion, 04972: Pancreatic secretion, 04973: Carbohydrate digestion and absorption, 04974: Protein digestion and absorption, 04976: Bile secretion
109245	127495	Lrrc39	0.283882	0.57051	2.00967	leucine rich repeat containing 39	GO:0003674: molecular_function, GO:0005575: cellular_component, GO:0008150: biological_process
667764		Gm15854	0.443022	0.888753	2.00612	predicted gene 15854
